# Supplementary material
Source: PubMed Central journal article supplement (PMC3370594)
Supplement: supp_80.6.2221_IAI-IAI06196-11-s01.pdf [file supp_80.6.2221_IAI-IAI06196-11-s01.pdf]

## **Supplemental Figures:**

Supplemental Figure 1. Blood plate phenotypes for select avirulent strains

Bacteria were struck on LB-G1P agar containing 5% defibrinated sheep's blood and incubated for 48 hr. at 37°C.

Supp. Table 1: Signature-tagged *L. monocytogenes* strains

Supp. Table 2: Signature tag sequences

Supp. Table 3: Mutagenic primers for site-directed mutagenesis

Supp. Table 4: Signature-tag-specific amplification primers

Supp. Table 5: Primers used for signature tag sequence insertion into pPL2

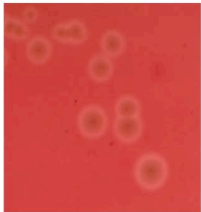

WT

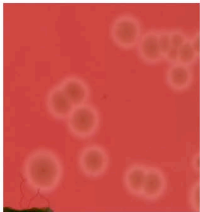

A374G

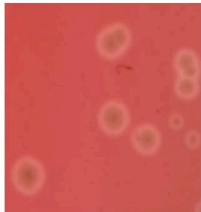

I204A

Supplemental Table 1.  
Signature-tagged *L. monocytogenes* strains

| Name | Residue | ST # | Name | Residue | ST # | Name | Residue | ST # |
|------|---------|------|------|---------|------|------|---------|------|
| 1.1A | K25A    | 5    | 1.3G | A47G    | 209  | 1.6E | D69A    | 58   |
| 1.1B | D26A    | 6    | 1.3H | S48A    | 210  | 1.6F | Y70A    | 102  |
| 1.1C | A27G    | 11   | 1.4A | P49A    | 211  | 1.6G | N71A    | 116  |
| 1.1D | S28A    | 20   | 1.4B | K50A    | 212  | 1.6H | K72A    | 119  |
| 1.1E | A29G    | 58   | 1.4C | T51A    | 213  | 1.7A | N73A    | 122  |
| 1.1F | F30A    | 102  | 1.4D | P52A    | 219  | 1.7B | N74A    | 128  |
| 1.1G | N31A    | 116  | 1.4E | I53A    | 230  | 1.7C | V75A    | 146  |
| 1.1H | K32A    | 119  | 1.4F | E54A    | 231  | 1.7D | L76A    | 150  |
| 1.2A | E33A    | 122  | 1.4G | K55A    | 234  | 1.7E | V77A    | 159  |
| 1.2B | N34A    | 128  | 1.4H | K56A    | 242  | 1.7F | Y78A    | 168  |
| 1.2C | S35A    | 146  | 1.5A | H57A    | 249  | 1.7G | H79A    | 169  |
| 1.2D | I36A    | 150  | 1.5B | A58G    | 282  | 1.7H | G80A    | 177  |
| 1.2E | S37A    | 159  | 1.5C | D59A    | 288  | 1.8A | D81A    | 184  |
| 1.2F | S38A    | 168  | 1.5D | E60A    | 290  | 1.8B | A82G    | 191  |
| 1.2G | M39A    | 169  | 1.5E | I61A    | 295  | 1.8C | V83A    | 201  |
| 1.2H | A40G    | 177  | 1.5F | D62A    | 296  | 1.8D | T84A    | 204  |
| 1.3A | P41A    | 184  | 1.5G | K63A    | 297  | 1.8E | N85A    | 205  |
| 1.3B | P42A    | 191  | 1.5H | Y64A    | 298  | 1.8F | V86A    | 208  |
| 1.3C | A43G    | 201  | 1.6A | I65A    | 5    | 1.8G | P87A    | 209  |
| 1.3D | S44A    | 204  | 1.6B | Q66A    | 6    | 1.8H | P88A    | 210  |
| 1.3E | P45A    | 205  | 1.6C | G67A    | 11   | 1.9A | R89A    | 211  |
| 1.3F | P46A    | 208  | 1.6D | L68A    | 20   | 1.9B | K90A    | 212  |

|       |       |     |       |       |     |      |       |     |
|-------|-------|-----|-------|-------|-----|------|-------|-----|
| 1.9C  | G91A  | 213 | 1.12H | A120G | 177 | 2.4E | R149A | 58  |
| 1.9D  | Y92A  | 219 | 2.1A  | I121A | 184 | 2.4F | D150A | 102 |
| 1.9E  | K93A  | 230 | 2.1B  | S122A | 191 | 2.4G | S151A | 116 |
| 1.9F  | D94A  | 231 | 2.1C  | S123A | 201 | 2.4H | L152A | 119 |
| 1.9G  | G95A  | 234 | 2.1D  | L124A | 204 | 2.5A | T153A | 122 |
| 1.9H  | N96A  | 242 | 2.1E  | T125A | 205 | 2.5B | L154A | 128 |
| 1.10A | E97A  | 249 | 2.1F  | Y126A | 208 | 2.5C | S155A | 146 |
| 1.10B | Y98A  | 282 | 2.1G  | P127A | 209 | 2.5D | I156A | 150 |
| 1.10C | I99A  | 288 | 2.1H  | G128A | 210 | 2.5E | D157A | 159 |
| 1.10D | V100A | 290 | 2.2A  | A129G | 211 | 2.5F | L158A | 168 |
| 1.10E | V101A | 295 | 2.2B  | L130A | 212 | 2.5G | P159A | 169 |
| 1.10F | E102A | 296 | 2.2C  | V131A | 213 | 2.5H | G160A | 177 |
| 1.10G | K103A | 297 | 2.2D  | L132A | 219 | 2.6A | M161A | 184 |
| 1.10H | K104A | 298 | 2.2E  | A133G | 230 | 2.6B | T162A | 191 |
| 1.11A | K105A | 5   | 2.2F  | N134A | 231 | 2.6C | N163A | 201 |
| 1.11B | K106A | 6   | 2.2G  | S135A | 234 | 2.6D | Q164A | 204 |
| 1.11C | S107A | 11  | 2.2H  | E136A | 242 | 2.6E | D165A | 205 |
| 1.11D | I108A | 20  | 2.3A  | L137A | 249 | 2.6F | N166A | 208 |
| 1.11E | N109A | 58  | 2.3B  | V138A | 282 | 2.6G | K167A | 209 |
| 1.11F | Q110A | 102 | 2.3C  | E139A | 288 | 2.6H | I168A | 210 |
| 1.11G | N111A | 116 | 2.3D  | N140A | 290 | 2.7A | V169A | 211 |
| 1.11H | N112A | 119 | 2.3E  | Q141A | 295 | 2.7B | V170A | 212 |
| 1.12A | A113G | 169 | 2.3F  | P142A | 296 | 2.7C | K171A | 213 |
| 1.12B | D114A | 122 | 2.3G  | D143A | 297 | 2.7D | N172A | 219 |
| 1.12C | I115A | 128 | 2.3H  | V144A | 298 | 2.7E | A173G | 230 |
| 1.12D | Q116A | 146 | 2.4A  | L145A | 5   | 2.7F | T174A | 231 |
| 1.12E | V117A | 150 | 2.4B  | P146A | 6   | 2.7G | K175A | 234 |
| 1.12F | V118A | 159 | 2.4C  | V147A | 11  | 2.7H | S176A | 242 |
| 1.12G | N119A | 168 | 2.4D  | K148A | 20  | 2.8A | N177A | 249 |

|       |       |     |       |       |     |      |       |     |
|-------|-------|-----|-------|-------|-----|------|-------|-----|
| 2.8B  | V178A | 282 | 2.11G | D207A | 209 | 3.3D | F236A | 150 |
| 2.8C  | N179A | 288 | 2.11H | D208A | 210 | 3.3E | F237A | 159 |
| 2.8D  | N180A | 290 | 2.12A | E209A | 211 | 3.3F | A238G | 168 |
| 2.8E  | A181G | 295 | 2.12B | M210A | 212 | 3.3G | I239A | 169 |
| 2.8F  | V182A | 296 | 2.12C | A211G | 213 | 3.3H | S240A | 177 |
| 2.8G  | N183A | 297 | 2.12D | Y212A | 219 | 3.4A | E241A | 184 |
| 2.8H  | T184A | 298 | 2.12E | S213A | 230 | 3.4B | G242  | 191 |
| 2.9A  | L185A | 5   | 2.12F | E214A | 231 | 3.4C | K243A | 201 |
| 2.9B  | V186A | 6   | 2.12G | S215A | 234 | 3.4D | M244A | 204 |
| 2.9C  | E187A | 11  | 2.12H | Q216A | 242 | 3.4E | Q245A | 205 |
| 2.9D  | R188A | 20  | 3.1A  | L217A | 249 | 3.4F | E246A | 208 |
| 2.9E  | W189A | 58  | 3.AB  | I218A | 282 | 3.4G | E247A | 209 |
| 2.9F  | N190A | 102 | 3.1C  | A219G | 288 | 3.4H | V248A | 210 |
| 2.9G  | E191A | 116 | 3.1D  | K220A | 290 | 3.5A | I240A | 211 |
| 2.9H  | K192A | 119 | 3.1E  | F221A | 295 | 3.5B | S250A | 212 |
| 2.10A | Y193A | 122 | 3.1F  | G222A | 296 | 3.5C | F251A | 213 |
| 2.10B | A194A | 128 | 3.1G  | T223A | 297 | 3.5D | K252A | 219 |
| 2.10C | Q195A | 146 | 3.1H  | A224G | 298 | 3.5E | Q253A | 230 |
| 2.10D | A196G | 150 | 3.2A  | F225A | 5   | 3.5F | I254A | 231 |
| 2.10E | Y197A | 159 | 3.2B  | K226A | 6   | 3.5G | Y255A | 234 |
| 2.10F | P198A | 168 | 3.2C  | A227G | 11  | 3.5H | Y256A | 242 |
| 2.10G | N199A | 169 | 3.2D  | V228A | 20  | 3.6A | N257A | 249 |
| 2.10H | V200A | 177 | 3.2E  | N229A | 58  | 3.6B | V258A | 282 |
| 2.11A | S201A | 184 | 3.2F  | N230  | 102 | 3.6C | N259A | 288 |
| 2.11B | A202G | 191 | 3.2G  | S231A | 116 | 3.6D | V260A | 290 |
| 2.11C | K203A | 201 | 3.2H  | L232A | 119 | 3.6E | N261A | 295 |
| 2.11D | I204A | 204 | 3.3A  | N233A | 122 | 3.6F | E262A | 296 |
| 2.11E | D205A | 205 | 3.3B  | V234A | 128 | 3.6G | P263A | 297 |
| 2.11F | Y206A | 208 | 3.3C  | N235A | 146 | 3.6H | T264A | 298 |

|       |       |     |       |       |     |      |       |     |
|-------|-------|-----|-------|-------|-----|------|-------|-----|
| 3.7A  | R265A | 5   | 3.10F | S294A | 231 | 4.2C | V323A | 201 |
| 3.7B  | P266A | 6   | 3.10G | S295A | 234 | 4.2D | S324A | 204 |
| 3.7C  | S267A | 11  | 3.10H | V296A | 242 | 4.2E | G325A | 205 |
| 3.7D  | R268A | 20  | 3.11A | A297G | 249 | 4.2F | K326A | 208 |
| 3.7E  | F269A | 58  | 3.11B | Y298A | 282 | 4.2G | S327A | 209 |
| 3.7F  | F270A | 102 | 3.11C | G299A | 288 | 4.2H | V328A | 210 |
| 3.7G  | G271A | 116 | 3.11D | R300A | 290 | 4.3A | S329A | 211 |
| 3.7H  | K272A | 119 | 3.11E | Q301A | 295 | 4.3B | G330A | 212 |
| 3.8A  | A273G | 122 | 3.11F | V302A | 296 | 4.3C | D331A | 213 |
| 3.8B  | V274A | 128 | 3.11G | Y303A | 297 | 4.3D | V332A | 219 |
| 3.8C  | T275A | 146 | 3.11H | L304A | 298 | 4.3E | E333A | 230 |
| 3.8D  | K276A | 150 | 3.12A | K305A | 5   | 4.3F | L334A | 231 |
| 3.8E  | E277A | 159 | 3.12B | L306A | 6   | 4.3G | T335A | 234 |
| 3.8F  | Q278A | 168 | 3.12C | S307A | 11  | 4.3H | N336A | 242 |
| 3.8G  | L279A | 169 | 3.12D | T308A | 20  | 4.4A | I337A | 249 |
| 3.8H  | Q280A | 177 | 3.12E | N309A | 58  | 4.4B | I338A | 282 |
| 3.9A  | A281G | 184 | 3.12F | S310A | 102 | 4.4C | K339A | 288 |
| 3.9B  | L282A | 191 | 3.12G | H311A | 116 | 4.4D | N340A | 290 |
| 3.9C  | G283A | 201 | 3.12H | S312A | 119 | 4.4E | S341A | 295 |
| 3.9D  | V284A | 204 | 4.1A  | T313A | 122 | 4.4F | S342A | 296 |
| 3.9E  | N285A | 205 | 4.1B  | K314A | 128 | 4.4G | F343A | 297 |
| 3.9F  | A286G | 208 | 4.1C  | V315A | 146 | 4.4H | K344A | 298 |
| 3.9G  | E287A | 209 | 4.1D  | K316A | 150 | 4.5A | A345G | 5   |
| 3.9H  | N288A | 210 | 4.1E  | A317G | 159 | 4.5B | V346A | 6   |
| 3.10A | P289A | 211 | 4.1F  | A318G | 168 | 4.5C | I347A | 11  |
| 3.10B | P290A | 212 | 4.1G  | F319A | 169 | 4.5D | Y348A | 20  |
| 3.10C | A291G | 213 | 4.1H  | D320A | 177 | 4.5E | G349A | 58  |
| 3.10D | Y292A | 219 | 4.2A  | A321G | 184 | 4.5F | G350A | 102 |
| 3.10E | I293A | 230 | 4.2B  | A322G | 191 | 4.5G | S351A | 116 |

|      |       |     |       |       |     |      |       |     |
|------|-------|-----|-------|-------|-----|------|-------|-----|
| 4.5H | A352G | 119 | 4.9E  | P381A | 295 | 5.1B | T410A | 212 |
| 4.6A | K353A | 122 | 4.9F  | G382A | 296 | 5.1C | S411A | 213 |
| 4.6B | D354A | 128 | 4.9G  | V383A | 297 | 5.1D | K412A | 219 |
| 4.6C | E355A | 146 | 4.9H  | P384A | 298 | 5.1E | A413G | 230 |
| 4.6D | V356A | 150 | 4.10A | I385A | 5   | 5.1F | Y414A | 231 |
| 4.6E | Q357A | 159 | 4.10B | A386G | 6   | 5.1G | T415A | 234 |
| 4.6F | I358A | 168 | 4.10C | Y387A | 11  | 5.1H | D416A | 242 |
| 4.6G | I359A | 169 | 4.10D | T388A | 20  | 5.2A | G417A | 249 |
| 4.6H | D360A | 177 | 4.10E | T389A | 58  | 5.2B | K418A | 282 |
| 4.7A | G361A | 184 | 4.10F | N390A | 102 | 5.2C | I419A | 288 |
| 4.7B | N362A | 191 | 4.10G | F391A | 116 | 5.2D | N420A | 290 |
| 4.7C | L363A | 201 | 4.10H | L392A | 119 | 5.2E | I421A | 295 |
| 4.7D | G364A | 204 | 4.11A | K393A | 122 | 5.2F | D422A | 296 |
| 4.7E | D365A | 205 | 4.11B | D394A | 128 | 5.2G | H423A | 297 |
| 4.7F | L366A | 208 | 4.11C | N395A | 146 | 5.2H | S424A | 298 |
| 4.7G | R367A | 209 | 4.11D | E396A | 150 | 5.3A | G425A | 5   |
| 4.7H | D368A | 210 | 4.11E | L397A | 159 | 5.3B | G426A | 6   |
| 4.8A | I369A | 211 | 4.11F | A398G | 168 | 5.3C | Y427A | 11  |
| 4.8B | L370A | 212 | 4.11G | V399A | 169 | 5.3D | V428A | 20  |
| 4.8C | K371A | 213 | 4.11H | I400A | 177 | 5.3E | A429G | 58  |
| 4.8D | K372A | 219 | 4.12A | K401A | 184 | 5.3F | Q430A | 102 |
| 4.8E | G373A | 230 | 4.12B | N402A | 191 | 5.3G | F431A | 116 |
| 4.8F | A374G | 231 | 4.12C | N403A | 201 | 5.3H | N432A | 119 |
| 4.8G | T375A | 234 | 4.12D | S404A | 204 | 5.4A | I433A | 122 |
| 4.8H | F376A | 242 | 4.12E | E405A | 205 | 5.4B | S434A | 128 |
| 4.9A | N377A | 249 | 4.12F | Y406A | 208 | 5.4C | W435A | 146 |
| 4.9B | R378A | 282 | 4.12G | I407A | 209 | 5.4D | D436A | 150 |
| 4.9C | E379A | 288 | 4.12H | E408A | 210 | 5.4E | E437A | 159 |
| 4.9D | T380A | 290 | 5.1A  | T409A | 211 | 5.4F | V438A | 168 |

|      |       |     |       |       |     |       |       |     |
|------|-------|-----|-------|-------|-----|-------|-------|-----|
| 5.4G | N439A | 169 | 5.8D  | I468A | 20  | 5.12A | D497A | 249 |
| 5.4H | Y440A | 177 | 5.8E  | Y469A | 58  | 5.12B | D498A | 282 |
| 5.5A | D441A | 184 | 5.8F  | L470A | 102 | 5.12C | R499A | 288 |
| 5.5B | P442A | 191 | 5.8G  | P471A | 116 | 5.12D | N500A | 290 |
| 5.5C | E443A | 201 | 5.8H  | G472A | 119 | 5.12E | L501A | 295 |
| 5.5D | G444A | 204 | 5.9A  | N473A | 122 | 5.12F | P502A | 296 |
| 5.5E | N445A | 205 | 5.9B  | A474G | 128 | 5.12G | L503A | 297 |
| 5.5F | E446A | 208 | 5.9C  | R475A | 146 | 5.12H | V504A | 298 |
| 5.5G | I447A | 209 | 5.9D  | N476A | 150 | 6.1A  | K505A | 5   |
| 5.5H | V448A | 210 | 5.9E  | I477A | 159 | 6.1B  | N506A | 6   |
| 5.6A | Q449A | 211 | 5.9F  | N478A | 168 | 6.1C  | R507A | 11  |
| 5.6B | H450A | 212 | 5.9G  | V479A | 169 | 6.1D  | N508A | 20  |
| 5.6C | K451A | 213 | 5.9H  | Y480A | 177 | 6.1E  | I509A | 58  |
| 5.6D | N452A | 219 | 5.10A | A481G | 184 | 6.1F  | S510A | 102 |
| 5.6E | W453A | 230 | 5.10B | K482A | 191 | 6.1G  | I511A | 116 |
| 5.6F | S454A | 231 | 5.10C | E483A | 201 | 6.1H  | W512A | 119 |
| 5.6G | E455A | 234 | 5.10D | C484A | 204 | 6.2A  | G513A | 122 |
| 5.6H | N456A | 242 | 5.10E | T485A | 205 | 6.2B  | T514A | 128 |
| 5.7A | N457A | 249 | 5.10F | G486A | 208 | 6.2C  | T515A | 146 |
| 5.7B | K458A | 282 | 5.10G | L487A | 209 | 6.2D  | L516A | 150 |
| 5.7C | S459A | 288 | 5.10H | A488G | 210 | 6.2E  | Y517A | 159 |
| 5.7D | K460A | 290 | 5.11A | W489A | 211 | 6.2F  | P518A | 168 |
| 5.7E | L461A | 295 | 5.11B | E490A | 212 | 6.2G  | K519A | 169 |
| 5.7F | A462G | 296 | 5.11C | W491A | 213 | 6.2H  | Y520A | 177 |
| 5.7G | H463A | 297 | 5.11D | W492A | 219 | 6.3A  | S521A | 184 |
| 5.7H | F464A | 298 | 5.11E | R493A | 230 | 6.3B  | N522A | 191 |
| 5.8A | T465A | 5   | 5.11F | T494A | 231 | 6.3C  | K523A | 201 |
| 5.8B | S466A | 6   | 5.11G | V495A | 234 | 6.3D  | V524A | 204 |
| 5.8C | S467A | 11  | 5.11H | I496A | 242 | 6.3E  | D525A | 205 |



|      |       |     |      |       |     |
|------|-------|-----|------|-------|-----|
| 6.3F | N526A | 208 | 6.3H | I528A | 210 |
| 6.3G | P527A | 209 | 6.4A | E529A | 211 |

Supplemental Table 2.  
Signature tag sequences

| ST  | Sequence                                  |
|-----|-------------------------------------------|
| 5   | ATCTACAACCAACCCCCGCAAACCTCTCCCGCCCTCTAGCA |
| 6   | CCATAGCTACCACACGATAGCTCCCCCTAGCCCCCTACTC  |
| 11  | CGGGGTGGTGTGTGGGAGGTTTAGAGGTTTATTTTCGTGTG |
| 20  | ATCAACAACCTACCGACCACGATCGACATCCAACGCCCCAT |
| 58  | CGCAAATCACTAGCCCTATAGCGACCCCTCTACCCCAAC   |
| 102 | AACCATAGCGATATCTACCCCAATCTCTCGCCCCCTCTAC  |
| 116 | GGATGGCGGAGATGGAGCTCTTGGGTGCTCTTGCGGTTG   |
| 119 | CGCCCCCTCCCCACATAAAGAGAGCTAAACAAAAACATCA  |
| 122 | ACAGCTCCAAACCTCGCTAAACAGCCCACCCACTCTCCAC  |
| 128 | TTAGGTAGGTGTATGTGGCGAGGGCGCTGGAGAGAGATAG  |
| 146 | CGCCATATCGCCACCCCACTAGCCCCCCTCACCACCTCT   |
| 150 | ATATACCGCTCAACATACACCCCCATCCCCCACCTCGCA   |
| 159 | AAACACCGAACACCCCCCCACGCACCAGACACACAACCAG  |
| 168 | ATATAACAATCCCTAGCCCCCTATCCAGCCATCTCTCCCC  |
| 169 | GGTTCGGGATAGTGATATAGATGTGGGGGGGGTGGGCTCG  |
| 177 | AGATGGAGATGGGGAGTTGGTGGTCGGGGTGGCGGGTAT   |
| 184 | CTCTATCTAGCTCGAGCCATATATCGCCACCTACCCCCC   |
| 191 | AACTACCGCAAACGCTCGCTAAAAACATCCATATCTAAC   |
| 201 | CTCCCTCCCTCCACCTACCCTCTATCTCGAGAAAGCTCC   |
| 204 | TTAGCGATCTCTCGCGCTTGGGGGATAGCTATATGGGTAT  |
| 205 | CCCCCGCTACCCTGATATCCCCCTTTCCGCTCTCTAGCA   |
| 208 | GTCGAGCTATAGGGATCTAGTGGTATAGGGGTTTGGGTGCG |
| 209 | TTATGGGTAGAGCGAGATTGTGCTATTGCTAGAGTGATAG  |
| 210 | GGAGCGGGATGGAGCGTTGTGGCGGGCTCTAGATCGGGTG  |
| 211 | GGAGAGCGGTCGCTTTATAGCGATTTATATATATCTAGTT  |
| 212 | GTAGAGATATAGAGCGATCGCGTTATAGATGTATTGCTGG  |
| 213 | ACATAGACACATCAAATCCCCAGCTCTCTAGCGCCATAA   |
| 219 | CCCTAAAACCCTACAGCAATCACGATATACCGCTCCCGAC  |
| 230 | CCAGACCCAGACCTATCGCCCTACCTACATAGAAACACCA  |
| 231 | CTAAAGCACTCTTAGCCCGAGAGATCCCAACATCACGCGAC |
| 234 | AACCCCCGAACCAGCCAGCACTCCGATATATCTCACCAACC |

242 ATTTGATGTATATATGTAGCGATAGGGGTGTCGCTTTAG  
249 ATATATATGTGATCGCTGGCGCGCGATGGATATGGTGAT  
282 ACAGAACGCGATAACTCTCTATAGCAAACCAATCCCACC  
288 CTATCCAAGTAGACCTCTAGCTACATCGCTCACTACCCCC  
290 ATCTCTCACCACCGCGACCGACAGCTCGAACAAGCAAGAG  
295 ACACCTACATCAAACCCTCCCCAGAGAAAGATAAACCTCC  
296 GTGGATAGTGAGGGCGGGCGAGAGCTTGCTTGCGCGAGTG  
297 GATCCGTCGCCAAATCGAGTCAGAGGTCTAGCTATCGCGACACTG  
298 GATCCGTCTTTGGCAAAGAGTACCCTGGATCAGTCTCGAGTGCG

---

---

Supplemental Table 3.  
Mutagenic primers for site-directed mutagenesis

---

|        |                                     |
|--------|-------------------------------------|
| K2A-F  | AGAGTGAAACCCATGGCAAAAATAATGCTAGTT   |
| K2A-R  | AACTAGCATTATTTTTGCCATGGGTTTCACTCT   |
| K3A-F  | GTGAAACCCATGAAAGCAATAATGCTAGTTTTT   |
| K3A-R  | AAAACTAGCATTATTGCTTTCATGGGTTTCAC    |
| I4A-F  | AAACCCATGAAAAAAGCAATGCTAGTTTTTATT   |
| I4A-R  | AATAAAAAGCTAGCATTGCTTTTTTTCATGGGTTT |
| M5A-F  | CCCATGAAAAAATAGCGCTAGTTTTTATTACA    |
| M5A-R  | TGTAATAAAAAGCTAGCGCTATTTTTTTCATGGG  |
| L6A-F  | ATGAAAAAATAATGGCAGTTTTTATTACACTT    |
| L6A-R  | AAGTGTAATAAAAAGCTGCCATTATTTTTTTCAT  |
| V7A-F  | AAAAAATAATGCTAGCTTTTATTACACTTATA    |
| V7A-R  | TATAAGTGTAATAAAAGCTAGCATTATTTTTTT   |
| F8A-F  | AAAATAATGCTAGTTGCTATTACACTTATATTA   |
| F8A-R  | TAATATAAGTGTAATAGCAACTAGCATTATTTT   |
| I9A-F  | ATAATGCTAGTTTTTGTACACTTATATTAGTT    |
| I9A-R  | AACTAATATAAGTGCTAGCAAAAAGCTAGCATTAT |
| T10A-F | ATGCTAGTTTTTATTGCACTTATATTAGTTAGT   |
| T10A-R | ACTAACTAATATAAGTGCAATAAAAAGCTAGCAT  |
| L11A-F | CTAGTTTTTATTACAGCTATATTAGTTAGTCTA   |
| L11A-R | TAGACTAACTAATATAGCTGTAATAAAAAGCTAG  |
| I12A-F | GTTTTTATTACACTTGCATTAGTTAGTCTACCA   |
| I12A-R | TGGTAGACTAACTAATGCAAGTGTAATAAAAAC   |
| L13A-F | TTTATTACACTTATAGCAGTTAGTCTACCAATT   |
| L13A-R | AATTGGTAGACTAACTGCTATAAGTGTAATAAAA  |
| V14A-F | ATTACACTTATATTAGCTAGTCTACCAATTGCG   |
| V14A-R | CGCAATTGGTAGACTAGCTAATATAAGTGTAAT   |
| S15A-F | ACACTTATATTAGTTGCTCTACCAATTGCGCAA   |
| S15A-R | TTGCGCAATTGGTAGAGCAACTAATATAAGTGT   |
| L16A-F | CTTATATTAGTTAGTGCACCAATTGCGCAACAA   |
| L16A-R | TTGTTGCGCAATTGGTGCACCTAACTAATATAAG  |
| P17A-F | ATATTAGTTAGTCTAGCAATTGCGCAACAAACT   |
| P17A-R | AGTTTGTGCGCAATTGCTAGACTAACTAATAT    |
| I18A-F | TTAGTTAGTCTACCAGCTGCGCAACAAACTGAA   |
| I18A-R | TTCAGTTTGTGCGCAGCTGGTAGACTAACTAA    |
| A19G-F | GTTAGTCTACCAATTGGGCAACAAACTGAAGCA   |
| A19G-R | TGCTTCAGTTTGTGCCCCAATTGGTAGACTAAC   |
| Q20A-F | AGTCTACCAATTGCGGCACAAACTGAAGCAAAG   |
| Q20A-R | CTTTGCTTCAGTTTGTGCGCAATTGGTAGACT    |
| Q21A-F | CTACCAATTGCGCAAGCAACTGAAGCAAAGGAT   |
| Q21A-R | ATCCTTTGCTTCAGTTGCTTGCAGCAATTGGTAG  |
| T22A-F | CCAATTGCGCAACAAGCTGAAGCAAAGGATGCA   |

T22A-R TGCATCCTTTGCTTCAGCTTGTTGCGCAATTGG  
E23A-F ATTGCGCAACAAACTGCAGCAAAGGATGCATCT  
E23A-R AGATGCATCCTTTGCTGCAGTTTGTGCGCAAT  
A24G-F GCGCAACAAACTGAAGGAAAGGATGCATCTGCA  
A24G-R TGCAGATGCATCCTTTCCTTCAGTTTGTGCGC  
K25A-F CAACAAACTGAAGCAGCGGATGCATCTGCATTC  
K25A-R GAATGCAGATGCATCCGCTGCTTCAGTTTGTG  
D26A-F CAAACTGAAGCAAAGGCTGCATCTGCATTCAAT  
D26A-R ATTGAATGCAGATGCAGCCTTTGCTTCAGTTG  
A27G-F ACTGAAGCAAAGGATGGATCTGCATTCAATAAA  
A27G-R TTTATTGAATGCAGATCCATCCTTTGCTTCAGT  
A29G-F GAAGCAAAGGATGCAGCTGCATTCAATAAAGAA  
A27G-R TTCTTTATTGAATGCAGCTGCATCCTTTGCTTC  
S28A-F GCAAAGGATGCATCTGGATTCAATAAAGAAAAT  
S28A-R TTCTTTATTGAATGCAGCTGCATCCTTTGCTTC  
A29G-F GCAAAGGATGCATCTGGATTCAATAAAGAAAAT  
A29G-R ATTTTCTTTATTGAATCCAGATGCATCCTTTGC  
F30A-F AAGGATGCATCTGCAGCCAATAAAGAAAATTCA  
F30A-R TGAATTTTCTTTATTGGCTGCAGATGCATCCTT  
N31A-F GATGCATCTGCATTTCGCTAAAGAAAATTCAATT  
N31A-R AATTGAATTTTCTTTAGCGAATGCAGATGCATC  
K32A-F GCATCTGCATTCAATGCAGAAAATTCAATTTCA  
K32A-R TGAAATTGAATTTTCTGCATTGAATGCAGATGC  
E33A-F TCTGCATTCAATAAAGCAAATTCAATTTTCATCC  
E33A-R GGATGAAATTGAATTTGCTTTATTGAATGCAGA  
N34A-F GCATTCAATAAAGAAGCTTCAATTTTCATCCATG  
N34A-R CATGGATGAAATTGAAGCTTCTTTATTGAATGC  
S35A-F TTCAATAAAGAAAATGCAATTTTCATCCATGGCA  
S35A-R TGCCATGGATGAAATTGCATTTTCTTTATTGAA  
I36A-F AATAAAGAAAATTCAGCTTTCATCCATGGCACCA  
I36A-R TGGTGCCATGGATGAAGCTGAATTTTCTTTATT  
S37A-F AAAGAAAATTCAATTGCATCCATGGCACCA  
S37A-R TGGTGGTGGCATGGATGCAATTGAATTTTCTTT  
S38A-F GAAAATTCAATTTTCAGCCATGGCACCA  
S38A-R TGCTGGTGGTGGCATGGCTGAAATTGAATTTTC  
M39A-F AATTCAATTTTCATCCGCGGCACCACCAGCATCT  
M39A-R AGATGCTGGTGGTGGCAGGATGAAATTGAATT  
A40G-F TCAATTTTCATCCATGGGACCACCAGCATCTCCG  
A40G-R CGGAGATGCTGGTGGTCCCATGGATGAAATTGA  
P41A-F ATTTTCATCCATGGCAGCACCAGCATCTCCGCCT  
P41A-R AGGCGGAGATGCTGGTGGTGGCATGGATGAAAT  
P42A-F TCATCCATGGCACCAGCAGCATCTCCGCCTGCA  
P42A-R TGCAGGCGGAGATGCTGCTGGTGGCATGGATGA  
A43G-F TCCATGGCACCAACCAGGATCTCCGCCTGCAAGT

A43G-R ACTTGCAGGCGGAGATCCTGGTGGTGCCATGGA  
S44A-F ATGGCACCACCAGCAGCTCCGCCTGCAAGTCCT  
S44A-R AGGACTTGCAGGCGGAGCTGCTGGTGGTGCCAT  
P45A-F GCACCACCAGCATCTGCGCCTGCAAGTCCTAAG  
P45A-R CTTAGGACTTGCAGGCGCAGATGCTGGTGGTGC  
P46A-F CCACCAGCATCTCCGGCTGCAAGTCCTAAGACG  
P46A-R CGTCTTAGGACTTGCAGCCGGAGATGCTGGTGG  
A47G-F CCAGCATCTCCGCCTGGAAGTCCTAAGACGCCA  
A47G-R TGGCGTCTTAGGACTTCCAGGCGGAGATGCTGG  
S48A-F GCATCTCCGCCTGCAGCTCCTAAGACGCCAATC  
S48A-R GATTGGCGTCTTAGGAGCTGCAGGCGGAGATGC  
P49A-F TCTCCGCCTGCAAGTGCTAAGACGCCAATCGAA  
P49A-R TTCGATTGGCGTCTTAGCACTTGCAGGCGGAGA  
K50A-F CCGCCTGCAAGTCCTGCGACGCCAATCGAAAAG  
K50A-R CTTTTCGATTGGCGTTCGCAGGACTTGCAGGCGG  
T51A-F CCTGCAAGTCCTAAGGCGCCAATCGAAAAGAAA  
T51A-R TTTCTTTTCGATTGGCGCCTTAGGACTTGCAGG  
P52A-F GCAAGTCCTAAGACGGCAATCGAAAAGAAACAC  
P52A-R GTGTTTCTTTTCGATTGCCGTCTTAGGACTTGC  
I53A-F AGTCCTAAGACGCCAGCCGAAAAGAAACACGCG  
I53A-R CGCGTGTTTCTTTTCGGCTGGCGTCTTAGGACT  
E54A-F CCTAAGACGCCAATCGCAAAGAAACACGCGGAT  
E54A-R ATCCGCGTGTTTCTTTGCGATTGGCGTCTTAGG  
K55A-F AAGACGCCAATCGAAGCGAAACACGCGGATGAA  
K55A-R TTCATCCGCGTGTTTTCGCTTCGATTGGCGTCTT  
K56A-F ACGCCAATCGAAAAGGCACACGCGGATGAAATC  
K56A-R GATTTTCATCCGCGTGTGCCTTTTCGATTGGCGT  
H57A-F CCAATCGAAAAGAAAGCCGCGGATGAAATCGAT  
H57A-R ATCGATTTTCATCCGCGGCTTTCTTTTCGATTGG  
A58G-F ATCGAAAAGAAACACGGGGATGAAATCGATAAG  
A58G-R CTTATCGATTTTCATCCCGTGTTTCTTTTCGAT  
D59A-F GAAAAGAAACACGCGGCTGAAATCGATAAGTAT  
D59A-R ATACTTATCGATTTTCAGCCGCGTGTTTCTTTTC  
E60A-F AAGAAACACGCGGATGCAATCGATAAGTATATA  
E60A-R TATATACTTATCGATTGCATCCGCGTGTTTCTT  
I61A-F AAACACGCGGATGAAGCCGATAAGTATATACAA  
I61A-R TTGTATATACTTATCGGCTTCATCCGCGTGTTT  
D62A-F CACGCGGATGAAATCGCTAAGTATATACAAGGA  
D62A-R TCCTTGTATATACTTAGCGATTTTCATCCGCGTG  
K63A-F GCGGATGAAATCGATGCGTATATACAAGGATTG  
K63A-R CAATCCTTGTATATACGCATCGATTTTCATCCGC  
Y64A-F GATGAAATCGATAAGGCTATACAAGGATTGGAT  
Y64A-R ATCCAATCCTTGTATAGCCTTATCGATTTTCATC  
I65A-F GAAATCGATAAGTATGCACAAGGATTGGATTAC

I65A-R GTAATCCAATCCTTGTGCATACTTATCGATTTTC  
Q66A-F ATCGATAAGTATATAGCAGGATTGGATTACAAT  
Q66A-R ATTGTAATCCAATCCTGCTATATACTTATCGAT  
G67A-F GATAAGTATATACAAGCATTGGATTACAATAAA  
G67A-R TTTATTGTAATCCAATGCTTGTATATACTTATC  
L68A-F AAGTATATACAAGGAGCGGATTACAATAAAAAC  
L68A-R GTTTTTATTGTAATCCGCTCCTTGTATATACTT  
D69A-F TATATACAAGGATTGGCTTACAATAAAAACAAT  
D69A-R ATTGTTTTTATTGTAAGCCAATCCTTGTATATA  
Y70A-F ATACAAGGATTGGATGCCAATAAAAACAATGTA  
Y70A-R TACATTGTTTTTATTGGCATCCAATCCTTGTAT  
N71A-F CAAGGATTGGATTACGCTAAAACAATGTATTA  
N71A-R TAATACATTGTTTTTAGCGTAATCCAATCCTTG  
K72A-F GGATTGGATTACAATGCAAACAATGTATTAGTA  
K72A-R TACTAATACATTGTTTGCATTGTAATCCAATCC  
N73A-F TTGGATTACAATAAAGCCAATGTATTAGTATAC  
N73A-R GTATACTAATACATTGGCTTTATTGTAATCCAA  
N74A-F GATTACAATAAAAACGCTGTATTAGTATACCAC  
N74A-R GTGGTATACTAATACAGCGTTTTTATTGTAATC  
V75A-F TACAATAAAAACAATGCATTAGTATACCACGGA  
V75A-R TCCGTGGTATACTAATGCATTGTTTTTATTGTA  
L76A-F AATAAAAACAATGTAGCAGTATACCACGGAGAT  
L76A-R ATCTCCGTGGTATACTGCTACATTGTTTTTATT  
V77A-F AAAACAATGTATTAGCATACCACGGAGATGCA  
V77A-R TGCATCTCCGTGGTATGCTAATACATTGTTTTT  
Y78A-F AACAATGTATTAGTAGCCACGGAGATGCAGTG  
Y78A-R CACTGCATCTCCGTGGGCTACTAATACATTGTT  
H79A-F AATGTATTAGTATACGCCGGAGATGCAGTGACA  
H79A-R TGTCACTGCATCTCCGGCGTATACTAATACATT  
G80A-F GTATTAGTATACCACGCAGATGCAGTGACAAAT  
G80A-R ATTTGTCACTGCATCTGCGTGGTATACTAATAC  
D81A-F TTAGTATACCACGGAGCTGCAGTGACAAATGTG  
D81A-R CACATTTGTCACTGCAGCTCCGTGGTATACTAA  
A82G-F GTATACCACGGAGATGGAGTGACAAATGTGCCG  
A82G-R CGGCACATTTGTCACTCCATCTCCGTGGTATAC  
V83A-F TACCACGGAGATGCAGCGACAAATGTGCCGCCA  
V83A-R TGGCGGCACATTTGTGCTGCATCTCCGTGGTA  
T84A-F CACGGAGATGCAGTGGCAAATGTGCCGCCAAGA  
T84A-R TCTTGGCGGCACATTTGCCACTGCATCTCCGTG  
N85A-F GGAGATGCAGTGACAGCTGTGCCGCCAAGAAAA  
N85A-R TTTTCTTGGCGGCACAGCTGTCACTGCATCTCC  
V86A-F GATGCAGTGACAAATGCGCCGCCAAGAAAAGGT  
V86A-R ACCTTTTCTTGGCGGCAGCTTGTCACTGCATC  
P87A-F GCAGTGACAAATGTGGCGCCAAGAAAAGGTTAC

P87A-R GTAACCTTTTCTTGGCGCCACATTTGTCACTGC  
P88A-F GTGACAAATGTGCCGGCAAGAAAAGGTTACAAA  
P88A-R TTTGTAACCTTTTCTTGGCCGGCACATTTGTCAC  
R89A-F ACAAATGTGCCGCCAGCAAAGGTTACAAAGAT  
R89A-R ATCTTTGTAACCTTTTGTCTGGCGGCACATTTGT  
K90A-F AATGTGCCGCCAAGAGCAGGTTACAAAGATGGA  
K90A-R TCCATCTTTGTAACCTGCTCTTGGCGGCACATT  
G91A-F GTGCCGCCAAGAAAAGCTTACAAAGATGGAAAT  
G91A-R ATTTCCATCTTTGTAAGCTTTTCTTGGCGGCAC  
Y92A-F CCGCCAAGAAAAGGTGCCAAAGATGGAAATGAA  
Y92A-R TTCATTTCCATCTTTGGCACCTTTTCTTGGCGG  
K93A-F CCAAGAAAAGGTTACGCAGATGGAAATGAATAT  
K93A-R ATATTCATTTCCATCTGCGTAACCTTTTCTTGG  
D94A-F AGAAAAGGTTACAAAGCTGGAAATGAATATATT  
D94A-R AATATATTCATTTCCAGCTTTGTAACCTTTTCT  
G95A-F AAAGGTTACAAAGATGCAAATGAATATATTGTT  
G95A-R AACAATATATTCATTTGCATCTTTGTAACCTTT  
N96A-F GGTTACAAAGATGGAGCTGAATATATTGTTGTG  
N96A-R CACAACAATATATTCAGCTCCATCTTTGTAACC  
E97A-F TACAAAGATGGAAATGCATATATTGTTGTGGAG  
E97A-R CTCCACAACAATATATGCATTTCCATCTTTGTA  
Y98A-F AAAGATGGAAATGAAGCTATTGTTGTGGAGAAA  
Y98A-R TTTCTCCACAACAATAGCTTCATTTCCATCTTT  
I99A-F GATGGAAATGAATATGCTGTTGTGGAGAAAAAG  
I99A-R CTTTTTCTCCACAACAGCATATTCATTTCCATC  
V100A-F GGAAATGAATATATTGCTGTGGAGAAAAAGAAG  
V100A-R CTTCTTTTTTCTCCACAGCAATATATTCATTTCC  
V101A-F AATGAATATATTGTTGCGGAGAAAAAGAAGAAA  
V101A-R TTTCTTTCTTTTCTCCGCAACAATATATTCATT  
E102A-F GAATATATTGTTGTGGCGAAAAAGAAGAAATCC  
E102A-R GGATTTCTTCTTTTTCGCCACAACAATATATTC  
K103A-F TATATTGTTGTGGAGGCAAAGAAGAAATCCATC  
K103A-R GATGGATTTCTTCTTTGCCTCCACAACAATATA  
K104A-F ATGTTGTGGAGAAAGCGAAGAAATCCATCAAT  
K104A-R ATTGATGGATTTCTTCGCTTTTCTCCACAACAAT  
K105A-F GTTGTGGAGAAAAAGGCGAAATCCATCAATCAA  
K105A-R TTGATTGATGGATTTGCCTTTTTTCTCCACAAC  
K106A-F GTGGAGAAAAAGAAGGCATCCATCAATCAAAT  
K106A-R ATTTTGATTGATGGATGCCTTTTCTTTTCTCCAC  
S107A-F GAGAAAAAGAAGAAAGCCATCAATCAAATAAT  
S107A-R ATTATTTTGATTGATGGCTTTTCTTTTCTC  
I108A-F AAAAGAAGAAATCCGCAATCAAATAATGCA  
I108A-R TGCATTATTTTGATTGGCGGATTTCTTCTTTTT  
N109A-F AAGAAGAAATCCATCGCTCAAATAATGCAGAC



N109A-R GTCTGCATTATTTTGAGCGATGGATTTCTTCTT  
Q110A-F AAGAAATCCATCAATGCAAATAATGCAGACATT  
Q110A-R AATGTCTGCATTATTTGCATTGATGGATTTCTT  
N111A-F AAATCCATCAATCAAGCTAATGCAGACATTCAA  
N111A-R TTGAATGTCTGCATTAGCTTGATTGATGGATTT  
N112A-F TCCATCAATCAAATGCTGCAGACATTCAAGTT  
N112A-R AACTTGAATGTCTGCAGCATTTTGATTGATGGA  
A113G-F ATCAATCAAATAATGGAGACATTCAAGTTGTG  
A113G-R CACAACCTGAATGTCTCCATTATTTTGATTGAT  
D114A-F AATCAAATAATGCAGCCATTCAAGTTGTGAAT  
D114A-R ATTCACAACCTGAATGGCTGCATTATTTTGATT  
I115A-F CAAAATAATGCAGACGCTCAAGTTGTGAATGCA  
I115A-R TGCATTCAACAACCTGAGCGTCTGCATTATTTTG  
Q116A-F AATAATGCAGACATTGCAGTTGTGAATGCAATT  
Q116A-R AATTGCATTCAACAACCTGCAATGTCTGCATTATT  
V117A-F AATGCAGACATTCAAGCTGTGAATGCAATTTG  
V117A-R CGAAATTGCATTACAGCTTGAATGTCTGCATT  
V118A-F GCAGACATTCAAGTTGCGAATGCAATTTGAGC  
V118A-R GCTCGAAATTGCATTGCGAACCTTGAATGTCTGC  
N119A-F GACATTCAAGTTGTGGCTGCAATTTGAGCCTA  
N119A-R TAGGCTCGAAATTGCAGCCACAACCTTGAATGTC  
A120G-F ATTCAGTTGTGAATGGAATTTGAGCCTAACCC  
A120G-R GGTTAGGCTCGAAATTCCATTCAACAACCTTGAAT  
I121A-F CAAGTTGTGAATGCAGCTTCGAGCCTAACCTAT  
I121A-R ATAGGTTAGGCTCGAAGCTGCATTCAACAACCTTG  
S122A-F GTTGTGAATGCAATTGCGAGCCTAACCTATCCA  
S122A-R TGGATAGGTTAGGCTCGCAATTGCATTCAACAAC  
S123A-F GTGAATGCAATTTGCGCCCTAACCTATCCAGGT  
S123A-R ACCTGGATAGGTTAGGGCCGAAATTGCATTAC  
L124A-F AATGCAATTTGAGCGCAACCTATCCAGGTGCT  
L124A-R AGCACCTGGATAGGTTGCGCTCGAAATTGCATT  
T125A-F GCAATTTGAGCCTAGCCTATCCAGGTGCTCTC  
T125A-R GAGAGCACCTGGATAGGCTAGGCTCGAAATTGC  
Y126A-F ATTTGAGCCTAACCGCTCCAGGTGCTCTCGTA  
Y126A-R TACGAGAGCACCTGGAGCGGTTAGGCTCGAAAT  
P127A-F TCGAGCCTAACCTATGCAGGTGCTCTCGTAAAA  
P127A-R TTTTACGAGAGCACCTGCATAGGTTAGGCTCGA  
G128A-F AGCCTAACCTATCCAGCTGCTCTCGTAAAAGCG  
G128A-R CGCTTTTACGAGAGCAGCTGGATAGGTTAGGCT  
A129G-F CTAACCTATCCAGGTGGTCTCGTAAAAGCGAAT  
A129G-R ATTCGCTTTTACGAGACCACCTGGATAGGTTAG  
L130A-F ACCTATCCAGGTGCTGCCGTAAAAGCGAATTCG  
L130A-R CGAATTCGCTTTTACGGCAGCACCTGGATAGGT  
V131A-F TATCCAGGTGCTCTCGCAAAGCGAATTCGGAA

V131A-R TTCCGAATTCGCTTTTTGCGAGAGCACCTGGATA  
K132A-F CCAGGTGCTCTCGTAGCAGCGAATTCGGAATTA  
K132A-R TAATTCGAATTCGCTGCTACGAGAGCACCTGG  
A133G-F GGTGCTCTCGTAAAAGGGAATTCGGAATTAGTA  
A133G-R TACTAATTCGAATTCCTTTTTACGAGAGCACCC  
N134A-F GCTCTCGTAAAAGCGGCTTCGGAATTAGTAGAA  
N134A-R TTCTACTAATTCGAAGCCGCTTTTTACGAGAGC  
S135A-F CTCGTAAAAGCGAATGCGGAATTAGTAGAAAAT  
S135A-R ATTTTCTACTAATTCGCGATTTCGCTTTTTACGAG  
E136A-F GTAAAAGCGAATTCGGCATTAGTAGAAAATCAA  
E136A-R TTGATTTTTCTACTAATGCCGAATTCGCTTTTTAC  
L137A-F AAAGCGAATTCGGAAGCAGTAGAAAATCAACCA  
L137A-R TGGTTGATTTTTCTACTGCTTCCGAATTCGCTTT  
V138A-F GCGAATTCGGAATTAGCAGAAAATCAACCAGAT  
V138A-R ATCTGGTTGATTTTTCTGCTAATTCGGAATTCGC  
E139A-F AATTCGGAATTAGTAGCAAATCAACCAGATGTT  
E139A-R AACATCTGGTTGATTTGCTACTAATTCCGAATT  
N140A-F TCGGAATTAGTAGAAGCTCAACCAGATGTTCTC  
N140A-R GAGAACATCTGGTTGAGCTTCTACTAATTCGGA  
Q141A-F GAATTAGTAGAAAATGCACCAGATGTTCTCCCT  
Q141A-R AGGGAGAACATCTGGTGCATTTTTCTACTAATTC  
P142A-F TTAGTAGAAAATCAAGCAGATGTTCTCCCTGTA  
P142A-R TACAGGGAGAACATCTGCTTGATTTTTCTACTAA  
D143A-F GTAGAAAATCAACCAGCTGTTCTCCCTGTAAAA  
D143A-R TTTTACAGGGAGAACAGCTGGTTGATTTTTCTAC  
V144A-F GAAAATCAACCAGATGCTCTCCCTGTAAAACGT  
V144A-R ACGTTTTACAGGGAGAGCATCTGGTTGATTTTC  
L145A-F AATCAACCAGATGTTGCCCTGTAAAACGTGAT  
L145A-R ATCACGTTTTACAGGGGCAACATCTGGTTGATT  
P146A-F CAACCAGATGTTCTCGCTGTAAAACGTGATTCA  
P146A-R TGAATCACGTTTTACAGCGAGAACATCTGGTTG  
V147A-F CCAGATGTTCTCCCTGCAAACGTGATTCATTA  
V147A-R TAATGAATCACGTTTTGCAGGGAGAACATCTGG  
K148A-F GATGTTCTCCCTGTAGCACGTGATTCATTAACA  
K148A-R TGTTAATGAATCACGTGCTACAGGGAGAACATC  
R149A-F GTTCTCCCTGTAAAAGCTGATTCATTAACACTC  
R149A-R GAGTGTTAATGAATCAGCTTTTTACAGGGAGAAC  
D150A-F CTCCCTGTAAAACGTGCTTCATTAACACTCAGC  
D150A-R GCTGAGTGTTAATGAAGCACGTTTTACAGGGAG  
S151A-F CCTGTAAAACGTGATGCATTAACACTCAGCATT  
S151A-R AATGCTGAGTGTTAATGCATCACGTTTTACAGG  
L152A-F GTAAAACGTGATTCAGCAACACTCAGCATTGAT  
L152A-R ATCAATGCTGAGTGTTGCTGAATCACGTTTTAC  
T153A-F AAACGTGATTCATTAGCACTCAGCATTGATTTG

T153A-R CAAATCAATGCTGAGTGCTAATGAATCACGTTT  
L154A-F CGTGATTCATTAACAGCCAGCATTGATTTGCCA  
L154A-R TGGCAAATCAATGCTGGCTGTTAATGAATCACG  
S155A-F GATTCATTAACACTCGCCATTGATTTGCCAGGT  
S155A-R ACCTGGCAAATCAATGGCGAGTGTTAATGAATC  
I156A-F TCATTAACACTCAGCGCTGATTTGCCAGGTATG  
I156A-R CATACTGGCAAATCAGCGCTGAGTGTTAATGA  
D157A-F TTAACACTCAGCATTGCTTTGCCAGGTATGACT  
D157A-R AGTCATACCTGGCAAAGCAATGCTGAGTGTTAA  
L158A-F ACACTCAGCATTGATGCGCCAGGTATGACTAAT  
L158A-R ATTAGTCATACCTGGCGCATCAATGCTGAGTGT  
P159A-F CTCAGCATTGATTTGGCAGGTATGACTAATCAA  
P159A-R TTGATTAGTCATACCTGCCAAATCAATGCTGAG  
G160A-F AGCATTGATTTGCCAGCTATGACTAATCAAGAC  
G160A-R GTCTTGATTAGTCATAGCTGGCAAATCAATGCT  
M161A-F ATTGATTTGCCAGGTGCGACTAATCAAGACAAT  
M161A-R ATTGTCTTGATTAGTCGCACCTGGCAAATCAAT  
T162A-F GATTTGCCAGGTATGGCTAATCAAGACAATAAA  
T162A-R TTTATTGTCTTGATTAGCCATACCTGGCAAATC  
N163A-F TTGCCAGGTATGACTGCTCAAGACAATAAAATC  
N163A-R GATTTTATTGTCTTGAGCAGTCATACCTGGCAA  
Q164A-F CCAGGTATGACTAATGCAGACAATAAAATCGTT  
Q164A-R AACGATTTTATTGTCTGCATTAGTCATACCTGG  
D165A-F GGTATGACTAATCAAGCCAATAAAATCGTTGTA  
D165A-R TACAACGATTTTATTGGCTTGATTAGTCATACC  
N166A-F ATGACTAATCAAGACGCTAAAATCGTTGTAAAA  
N166A-R TTTTACAACGATTTTAGCGTCTTGATTAGTCAT  
K167A-F ACTAATCAAGACAATGCAATCGTTGTAAAAAAT  
K167A-R ATTTTTTACAACGATTGCATTGTCTTGATTAGT  
I168A-F AATCAAGACAATAAAGCCGTTGTAAAAAATGCC  
I168A-R GGCATTTTTTACAACGGCTTTATTGTCTTGATT  
V169A-F CAAGACAATAAAATCGCTGTAAAAAATGCCACT  
V169A-R AGTGGCATTTTTTACAGCGATTTTATTGTCTTG  
V170A-F GACAATAAAATCGTTGCAAAAAATGCCACTAAA  
V170A-R TTTAGTGGCATTTTTTGCAACGATTTTATTGTC  
K171A-F AATAAAATCGTTGTAGCAAATGCCACTAAATCA  
K171A-R TGATTTAGTGGCATTGCTACAACGATTTTATT  
N172A-F AAAATCGTTGTAAAAGCTGCCACTAAATCAAAC  
N172A-R GTTTGATTTAGTGGCAGCTTTTACAACGATTTT  
A173G-F ATCGTTGTAAAAAATGGCACTAAATCAAACGTT  
A173G-R AACGTTTGATTTAGTGCCATTTTTTACAACGAT  
T174A-F GTTGTA AAAAATGCCGCTAAATCAAACGTTAAC  
T174A-R GTTAACGTTTGATTTAGCGGCATTTTTTACAAC  
K175A-F GTAAAAAATGCCACTGCATCAAACGTTAAACAAC

K175A-R GTTGTTAACGTTTGATGCAGTGGCATTTTTTTAC  
S176A-F AAAAATGCCACTAAAGCAAACGTTAACAACGCA  
S176A-R TGCGTTGTTAACGTTTGCTTTAGTGGCATTTTT  
N177A-F AATGCCACTAAATCAGCCGTTAACAACGCAGTA  
N177A-R TACTGCGTTGTTAACGGCTGATTTAGTGGCATT  
V178A-F GCCACTAAATCAAACGCTAACAACGCAGTAAAT  
V178A-R ATTTACTGCGTTGTTAGCGTTTGATTTAGTGGC  
N179A-F ACTAAATCAAACGTTGCCAACGCAGTAAATACA  
N179A-R TGTATTTACTGCGTTGGCAACGTTTGATTTAGT  
N180A-F AAATCAAACGTTAACGCCGCAGTAAATACATTA  
N180A-R TAATGTATTTACTGCGGCGTTAACGTTTGATTT  
A181G-F TCAAACGTTAACAACGGAGTAAATACATTAGTG  
A181G-R CACTAATGTATTTACTCCGTTGTTAACGTTTGA  
V182A-F AACGTTAACAACGCAGCAAATACATTAGTGGAA  
V182A-R TTCCACTAATGTATTTGCTGCGTTGTTAACGTT  
N183A-F GTTAACAACGCAGTAGCTACATTAGTGGAAAGA  
N183A-R TCTTTCCACTAATGTAGCTACTGCGTTGTTAAC  
T184A-F AACAACGCAGTAAATGCATTAGTGGAAAGATGG  
T184A-R CCATCTTTCCACTAATGCATTTACTGCGTTGTT  
L185A-F AACGCAGTAAATACAGCAGTGGAAAGATGGAAT  
L185A-R ATTCCATCTTTCCACTGCTGTATTTACTGCGTT  
V186A-F GCAGTAAATACATTAGCGGAAAGATGGAATGAA  
V186A-R TTCATTCCATCTTTCCGCTAATGTATTTACTGC  
E187A-F GTAAATACATTAGTGGCAAGATGGAATGAAAAA  
E187A-R TTTTTCATTCCATCTTGCCACTAATGTATTTAC  
R188A-F AATACATTAGTGGAAAGCATGGAATGAAAAATAT  
R188A-R ATATTTTTTCATTCCATGCTTCCACTAATGTATT  
W189A-F ACATTAGTGGAAAGAGCGAATGAAAAATATGCT  
W189A-R AGCATATTTTTTCATTGCTCTTTCCACTAATGT  
N190A-F TTAGTGGAAAGATGGGCTGAAAAATATGCTCAA  
N190A-R TTGAGCATATTTTTCAGCCCATCTTTCCACTAA  
E191A-F GTGGAAAGATGGAATGCAAAATATGCTCAAGCT  
E191A-R AGCTTGAGCATATTTTGCATTCCATCTTTCCAC  
K192A-F GAAAGATGGAATGAAGCATATGCTCAAGCTTAT  
K192A-R ATAAGCTTGAGCATATGCTTCATTCCATCTTTC  
Y193A-F AGATGGAATGAAAAAGCTGCTCAAGCTTATCCA  
Y193A-R TGGATAAGCTTGAGCAGCTTTTTTCATTCCATCT  
A194G-F TGGAATGAAAAATATGGTCAAGCTTATCCAAAT  
A194A-R ATTTGGATAAGCTTGACCATATTTTTTCATTCCA  
Q195A-F AATGAAAAATATGCTGCAGCTTATCCAAATGTA  
Q195A-R TACATTTGGATAAGCTGCAGCATATTTTTTCATT  
A196G-F GAAAAATATGCTCAAGGTTATCCAAATGTAAGT  
A196G-R ACTTACATTTGGATAACCTTGAGCATATTTTTTC  
Y197A-F AAATATGCTCAAGCTGCTCCAAATGTAAGTGCA

Y197A-R TGCACCTTACATTTGGAGCAGCTTGAGCATATTT  
P198A-F TATGCTCAAGCTTATGCAAATGTAAGTGCAAAA  
P198A-R TTTTGCACCTTACATTTGCATAAGCTTGAGCATA  
N199A-F GCTCAAGCTTATCCAGCTGTAAGTGCAAAAATT  
N199A-R AATTTTTGCACCTTACAGCTGGATAAGCTTGAGC  
V200A-F CAAGCTTATCCAAATGCAAGTGCAAAAATTGAT  
V200A-R ATCAATTTTTGCACCTTGCATTTGGATAAGCTTG  
S201A-F GCTTATCCAAATGTAGCTGCAAAAATTGATTAT  
S201A-R ATAATCAATTTTTGCAGCTACATTTGGATAAGC  
A202G-F TATCCAAATGTAAGTGGA AAAATTGATTATGAT  
A202G-R ATCATAATCAATTTTTCCACTTACATTTGGATA  
K203A-F CCAAATGTAAGTGCAAGCAATTGATTATGATGAC  
K203A-R GTCATCATAATCAATTGCTGCACTTACATTTGG  
I204A-F AATGTAAGTGCAAAAAGCTGATTATGATGACGAA  
I204A-R TTCGTCATCATAATCAGCTTTTGCACCTTACATT  
D205A-F GTAAGTGCAAAAATTGCTTATGATGACGAAATG  
D205A-R CATTTTCGTCATCATAAGCAATTTTTTGCACCTTAC  
Y206A-F AGTGCAAAAATTGATGCTGATGACGAAATGGCT  
Y206A-R AGCCATTTTCGTCATCAGCATCAATTTTTTGCACCT  
D207A-F GCAAAAATTGATTATGCTGACGAAATGGCTTAC  
D207A-R GTAAGCCATTTTCGTCAGCATAATCAATTTTTGC  
D208A-F AAAATTGATTATGATGCCGAAATGGCTTACAGT  
D208A-R ACTGTAAGCCATTTTCGGCATCATAATCAATTTT  
E209A-F ATTGATTATGATGACGCAATGGCTTACAGTGAA  
E209A-R TTCACTGTAAGCCATTGCGTCATCATAATCAAT  
M210A-F GATTATGATGACGAAGCGGCTTACAGTGAATCA  
M210A-R TGATTCACTGTAAGCCGCTTTCGTCATCATAATC  
A211G-F TATGATGACGAAATGGGTTACAGTGAATCACAA  
A211G-R TTGTGATTCACTGTAACCCATTTTCGTCATCATA  
Y212A-F GATGACGAAATGGCTGCCAGTGAATCACAATTA  
Y212A-R TAATTGTGATTCACTGGCAGCCATTTTCGTCATC  
S213A-F GACGAAATGGCTTACGCTGAATCACAATTAATT  
S213A-R AATTAATTGTGATTACAGCGTAAGCCATTTTCGTC  
E214A-F GAAATGGCTTACAGTGCATCACAATTAATTGCG  
E214A-R CGCAATTAATTGTGATGCACTGTAAGCCATTTTC  
S215A-F ATGGCTTACAGTGAAGCACAATTAATTGCGAAA  
S215A-R TTTTCGCAATTAATTGTGCTTCACTGTAAGCCAT  
Q216A-F GCTTACAGTGAATCAGCATTAAATTGCGAAATTT  
Q216A-R AAATTTTCGCAATTAATGCTGATTCACTGTAAGC  
L217A-F TACAGTGAATCACAAGCAATTGCGAAATTTGGT  
L217A-R ACCAAATTTTCGCAATTGCTTGTGATTCACTGTA  
I218A-F AGTGAATCACAATTAGCTGCGAAATTTGGTACA  
I218A-R TGTACCAAATTTTCGCAAGCTAATTGTGATTCACT  
A219G-F GAATCACAATTAATTGGGAAATTTGGTACAGCA

A219G-R TGCTGTACCAAATTTCCCAATTAATTGTGATTC  
K220A-F TCACAATTAATTGCGGCATTTGGTACAGCATTT  
K220A-R AAATGCTGTACCAAATGCCGCAATTAATTGTGA  
F221A-F CAATTAATTGCGAAAGCTGGTACAGCATTTAAA  
F221A-R TTTAAATGCTGTACCAGCTTTTCGCAATTAATTG  
G222A-F TTAATTGCGAAATTTGCTACAGCATTTAAAGCT  
G222A-R AGCTTTAAATGCTGTAGCAAATTTTCGCAATTAA  
T223A-F ATTGCGAAATTTGGTGCAGCATTTAAAGCTGTA  
T223A-R TACAGCTTTAAATGCTGCACCAAATTTTCGCAAT  
A224G-F GCGAAATTTGGTACAGGATTTAAAGCTGTAAAT  
A224G-R ATTTACAGCTTTAAATCCTGTACCAAATTTTCGC  
F225A-F AAATTTGGTACAGCAGCTAAAGCTGTAAATAAT  
F225A-R ATTATTTACAGCTTTAGCTGCTGTACCAAATTT  
K226A-F TTTGGTACAGCATTTGCAGCTGTAAATAATAGC  
K226A-R GCTATTATTTACAGCTGCAAATGCTGTACCAA  
A227G-F GGTACAGCATTTAAAGGTGTAAATAATAGCTTG  
A227G-R CAAGCTATTATTTACACCTTTAAATGCTGTACC  
V228A-F ACAGCATTTAAAGCTGCAAATAATAGCTTGAAT  
V228A-R ATCAAGCTATTATTTGCAGCTTTAAATGCTGT  
N229A-F GCATTTAAAGCTGTAGCTAATAGCTTGAATGTA  
N229A-R TACATTCAAGCTATTAGCTACAGCTTTAAATGC  
N230A-F TTTAAAGCTGTAAATGCTAGCTTGAATGTAAAC  
N230A-R GTTTACATTCAAGCTAGCATTTACAGCTTTAAA  
S231A-F AAAGCTGTAAATAATGCCTTGAATGTAAACTTC  
S231A-R GAAGTTTACATTCAAGGCATTATTTACAGCTTT  
L232A-F GCTGTAAATAATAGCGCGAATGTAAACTTCGGC  
L232A-R GCCGAAGTTTACATTCGCGCTATTATTTACAGC  
N233A-F GTAAATAATAGCTTGGCTGTAAACTTCGGCGCA  
N233A-R TGCGCCGAAGTTTACAGCCAAGCTATTATTTAC  
V234A-F AATAATAGCTTGAATGCAAACCTTCGGCGCAATC  
V234A-R GATTGCGCCGAAGTTTGCATTCAAGCTATTATT  
N235A-F AATAGCTTGAATGTAGCCTTCGGCGCAATCAGT  
N235A-R ACTGATTGCGCCGAAGGCTACATTCAAGCTATT  
F236A-F AGCTTGAATGTAAACGCCGGCGCAATCAGTGAA  
F236A-R TTCACTGATTGCGCCGGCGTTTACATTCAAGCT  
G237A-F TTGAATGTAAACTTCGCCGCAATCAGTGAAGGG  
G237A-R CCCTTCACTGATTGCGGCGAAGTTTACATTCAA  
A238G-F AATGTAAACTTCGGCGGAATCAGTGAAGGGAAA  
A238G-R TTTCCCTTCACTGATTCCGCCGAAGTTTACATT  
I239A-F GTAAACTTCGGCGCAGCCAGTGAAGGGAAAATG  
I239A-R CATTTTCCCTTCACTGGCTGCGCCGAAGTTTAC  
S240A-F AACTTCGGCGCAATCGCTGAAGGGAAAATGCAA  
S240A-R TTGCATTTTCCCTTCAAGCGATTGCGCCGAAGTT  
E241A-F TTCGGCGCAATCAGTGCAGGGAAAATGCAAGAA

E241A-R TTCTTGCATTTTCCCTGCACTGATTGCGCCGAA  
G242A-F GGCGCAATCAGTGAAGCGAAAATGCAAGAAGAA  
G242A-R TTCTTCTTGCATTTTCGCTTCACTGATTGCGCC  
K243A-F GCAATCAGTGAAGGGGCAATGCAAGAAGAAGTC  
K243A-R GACTTCTTCTTGCATTGCCCTTCACTGATTGC  
M244A-F ATCAGTGAAGGGAAAGCGCAAGAAGAAGTCATT  
M244A-R AATGACTTCTTCTTGCCTTTCCCTTCACTGAT  
Q245A-F AGTGAAGGGAAAATGGCAGAAGAAGTCATTAGT  
Q245A-R ACTAATGACTTCTTCTGCCATTTTCCCTTCACT  
E246A-F GAAGGGAAAATGCAAGCAGAAGTCATTAGTTTT  
E246A-R AAAACTAATGACTTCTGCTTGCATTTTCCCTTC  
E247A-F GGGAAAATGCAAGAAGCAGTCATTAGTTTTAAA  
E247A-R TTTAAAATAATGACTGCTTCTTGCATTTTCCC  
V248A-F AAAATGCAAGAAGAAGCCATTAGTTTTAAACAA  
V248A-R TTGTTTTAAAATAATGGCTTCTTCTTGCATTTT  
I249A-F ATGCAAGAAGAAGTCGCTAGTTTTAAACAAATT  
I249A-R AATTTGTTTTAAAATAAGCGACTTCTTCTTGCAT  
S250A-F CAAGAAGAAGTCATTGCTTTTAAACAAATTTAC  
S250A-R GTAAATTTGTTTTAAAAGCAATGACTTCTTCTTG  
F251A-F GAAGAAGTCATTAGTGCTAAACAAATTTACTAT  
F251A-R ATAGTAAATTTGTTTAGCACTAATGACTTCTTC  
K252A-F GAAGTCATTAGTTTTGCACAAATTTACTATAAC  
K252A-R GTTATAGTAAATTTGTGCAAAAATAATGACTTC  
Q253A-F GTCATTAGTTTTAAAGCAATTTACTATAACGTG  
Q253A-R CACGTTATAGTAAATTGCTTTAAAATAATGAC  
I254A-F ATTAGTTTTAAACAAGCTTACTATAACGTGAAT  
I254A-R ATTCACGTTATAGTAAGCTTGTTTTAAAATAAT  
Y255A-F AGTTTTAAACAAATTTGCCTATAACGTGAATGTT  
Y255A-R AACATTCACGTTATAGGCAATTTGTTTTAAAATA  
Y256A-F TTTAAACAAATTTACGCTAACGTGAATGTTAAT  
Y256A-R ATTAACATTCACGTTAGCGTAAATTTGTTTTAAA  
N257A-F AAACAAATTTACTATGCCGTGAATGTTAATGAA  
N257A-R TTCATTAACATTCACGGCATAGTAAATTTGTTT  
V258A-F CAAATTTACTATAACGCGAATGTTAATGAACCT  
V258A-R AGGTTCATTAAACATTCGCGTATAGTAAATTTG  
N259A-F ATTTACTATAACGTGGCTGTTAATGAACCTACA  
N259A-R TGTAGGTTCATTAAACAGCCACGTTATAGTAAAT  
V260A-F TACTATAACGTGAATGCTAATGAACCTACAAGA  
V260A-R TCTTGTAGGTTCATTAGCATTACGTTATAGTA  
N261A-F TATAACGTGAATGTTGCTGAACCTACAAGACCT  
N261A-R AGGTCTTGTAGGTTCCAGCAACATTCACGTTATA  
E262A-F AACGTGAATGTTAATGCACCTACAAGACCTTCC  
E262A-R GGAAGGTCTTGTAGGTGCATTAACATTCACGTT  
P263A-F GTGAATGTTAATGAAGCTACAAGACCTTCCAGA

P263A-R TCTGGAAGGTCTTGTAGCTTCATTAACATTAC  
T264A-F AATGTTAATGAACCTGCAAGACCTTCCAGATTT  
T264A-R AAATCTGGAAGGTCTTGCAGGTTTCATTAACATT  
R265A-F GTTAATGAACCTACAGCACCTTCCAGATTTTTTC  
R265A-R GAAAAATCTGGAAGGTGCTGTAGGTTTCATTAAC  
P266A-F AATGAACCTACAAGAGCTTCCAGATTTTTTCGGC  
P266A-R GCCGAAAAATCTGGAAGCTCTTGTAGGTTTCATT  
S267A-F GAACCTACAAGACCTGCCAGATTTTTTCGGCAA  
S267A-R TTTGCCGAAAAATCTGGCAGGTCTTGTAGGTTTC  
R268A-F CCTACAAGACCTTCCGCATTTTTTCGGCAAAGCT  
R268A-R AGCTTTGCCGAAAAATGCGGAAGGTCTTGTAGG  
F269A-F ACAAGACCTTCCAGAGCTTTTCGGCAAAGCTGTT  
F269A-R AACAGCTTTGCCGAAAGCTCTGGAAGGTCTTGT  
F270A-F AGACCTTCCAGATTTGCCGGCAAAGCTGTTACT  
F270A-R AGTAACAGCTTTGCCGGCAAATCTGGAAGGTCT  
G271A-F CCTTCCAGATTTTTTCGCCAAAGCTGTTACTAAA  
G271A-R TTTAGTAACAGCTTTGGCGAAAAATCTGGAAGG  
K272A-F TCCAGATTTTTTCGGCGCAGCTGTTACTAAAGAG  
K272A-R CTCTTTAGTAACAGCTGCGCCGAAAAATCTGGA  
A273G-F AGATTTTTTCGGCAAAGGTGTTACTAAAGAGCAG  
A273G-R CTGCTCTTTAGTAACACCTTTGCCGAAAAATCT  
V274A-F TTTTTCGGCAAAGCTGCTACTAAAGAGCAGTTG  
V274A-R CAACTGCTCTTTAGTAGCAGCTTTGCCGAAAA  
T275A-F TTCGGCAAAGCTGTTGCTAAAGAGCAGTTGCAA  
T275A-R TTGCAACTGCTCTTTAGCAACAGCTTTGCCGAA  
K276A-F GGCAAAGCTGTTACTGCAGAGCAGTTGCAAGCG  
K276A-R CGCTTGCAACTGCTCTGCAGTAACAGCTTTGCC  
E277A-F AAAGCTGTTACTAAAGCGCAGTTGCAAGCGCTT  
E277A-R AAGCGCTTGCAACTGCGCTTTAGTAACAGCTTT  
Q278A-F GCTGTTACTAAAGAGGCGTTGCAAGCGCTTGGA  
Q278A-R TCCAAGCGCTTGCAACGCCTCTTTAGTAACAGC  
L279A-F GTTACTAAAGAGCAGGCGCAAGCGCTTGAGTG  
L279A-R CACTCCAAGCGCTTGCGCCTGCTCTTTAGTAAC  
Q280A-F ACTAAAGAGCAGTTGGCAGCGCTTGAGTGAAT  
Q280A-R ATTCACTCCAAGCGCTGCCAACTGCTCTTTAGT  
A281G-F AAAGAGCAGTTGCAAGGGCTTGAGTGAATGCA  
A281G-R TGCATTCACTCCAAGCCCTTGCAACTGCTCTTT  
L282A-F GAGCAGTTGCAAGCGGCTGGAGTGAATGCAGAA  
L282A-R TTCTGCATTCACTCCAGCCGCTTGCAACTGCTC  
G283A-F CAGTTGCAAGCGCTTGCAAGTGAATGCAGAAAAT  
G283A-R ATTTTCTGCATTCACTGCAAGCGCTTGCAACTG  
V284A-F TTGCAAGCGCTTGAGCGAATGCAGAAAATCCT  
V284A-R AGGATTTTCTGCATTGCTCCAAGCGCTTGCAA  
N285A-F CAAGCGCTTGAGTGGCTGCAGAAAATCCTCCT



N285A-R AGGAGGATTTTCTGCAGCCACTCCAAGCGCTTG  
A286G-F GCGCTTGGAGTGAATGGAGAAAATCCTCCTGCA  
A286G-R TGCAGGAGGATTTTCTCCATTCACTCCAAGCGC  
E287A-F CTTGGAGTGAATGCAGCAAATCCTCCTGCATAT  
E287A-R ATATGCAGGAGGATTTGCTGCATTCACTCCAAG  
N288A-F GGAGTGAATGCAGAAGCTCCTCCTGCATATATC  
N288A-R GATATATGCAGGAGGAGCTTCTGCATTCACTCC  
P289A-F GTGAATGCAGAAAATGCTCCTGCATATATCTCA  
P289A-R TGAGATATATGCAGGAGCATTCTTCTGCATTAC  
P290A-F AATGCAGAAAATCCTGCTGCATATATCTCAAGT  
P290A-R ACTTGAGATATATGCAGCAGGATTTTCTGCATT  
A291G-F GCAGAAAATCCTCCTGGATATATCTCAAGTGTG  
A291G-R CACACTTGAGATATATCCAGGAGGATTTTCTGC  
Y292A-F GAAAATCCTCCTGCAGCTATCTCAAGTGTGGCG  
Y292A-R CGCCACACTTGAGATAGCTGCAGGAGGATTTTC  
I293A-F AATCCTCCTGCATATGCCTCAAGTGTGGCGTAT  
I293A-R ATACGCCACACTTGAGGCATATGCAGGAGGATT  
S294A-F CCTCCTGCATATATCGCAAGTGTGGCGTATGGC  
S294A-R GCCATACGCCACACTTGCGATATATGCAGGAGG  
S295A-F CCTGCATATATCTCAGCTGTGGCGTATGGCCGT  
S295A-R ACGGCCATACGCCACAGCTGAGATATATGCAGG  
V296G-F GCATATATCTCAAGTGCGGCGTATGGCCGTCAA  
V296A-R TTGACGGCCATACGCCGCACTTGAGATATATGC  
A297G-F TATATCTCAAGTGTGGGGTATGGCCGTCAAGTT  
A297G-R AACTTGACGGCCATACCCACACTTGAGATATA  
Y298A-F ATCTCAAGTGTGGCGGCTGGCCGTCAAGTTTAT  
Y298A-R ATAACTTGACGGCCAGCCGCCACACTTGAGAT  
G299A-F TCAAGTGTGGCGTATGCCCGTCAAGTTTATTTG  
G299A-R CAAATAAACTTGACGGGCATACGCCACACTTGA  
R300A-F AGTGTGGCGTATGGCGCTCAAGTTTATTTGAAA  
R300A-R TTTCAAATAAACTTGAGCGCCATACGCCACACT  
Q301A-F GTGGCGTATGGCCGTGCAGTTTATTTGAAATTA  
Q301A-R TAATTTCAAATAAACTGCACGGCCATACGCCAC  
V302A-F GCGTATGGCCGTCAAGCTTATTTGAAATTATCA  
V302A-R TGATAATTTCAAATAAGCTTGACGGCCATACGC  
Y303A-F TATGGCCGTCAAGTTGCTTTGAAATTATCAACT  
Y303A-R AGTTGATAATTTCAAAGCAACTTGACGGCCATA  
L304A-F GGCCGTCAAGTTTATGCGAAATTATCAACTAAT  
L304A-R ATTAGTTGATAATTTTCGCATAAACTTGACGGCC  
K305A-F CGTCAAGTTTATTTGGCATTATCAACTAATTCC  
K305A-R GGAATTAGTTGATAATGCCAAATAAACTTGACG  
L306A-F CAAGTTTATTTGAAAGCATCAACTAATTCCCAT  
L306A-R ATGGGAATTAGTTGATGCTTTCAAATAAACTTG  
S307A-F GTTTATTTGAAATTAGCAACTAATTCCCATAGT

S307A-R ACTATGGGAATTAGTTGCTAATTTCAAATAAAC  
T308A-F TATTTGAAATTATCAGCTAATTCCCATAGTACT  
T308A-R AGTACTATGGGAATTAGCTGATAATTTCAAATA  
N309A-F TTGAAATTATCAACTGCTTCCCATAGTACTAAA  
N309A-R TTTAGTACTATGGGAAGCAGTTGATAATTTCAA  
S310A-F AAATTATCAACTAATGCCCATAGTACTAAAGTA  
S310A-R TACTTTAGTACTATGGGCATTAGTTGATAATTT  
H311A-F TTATCAACTAATTCCGCTAGTACTAAAGTAAAA  
H311A-R TTTTACTTTAGTACTAGCGGAATTAGTTGATAA  
S312A-F TCAACTAATTCCCATGCTACTAAAGTAAAAGCT  
S312A-R AGCTTTTACTTTAGTAGCATGGGAATTAGTTGA  
T313A-F ACTAATTCCCATAGTGCTAAAGTAAAAGCTGCT  
T313A-R AGCAGCTTTTACTTTAGCACTATGGGAATTAGT  
K314A-F AATTTCCCATAGTACTGCAGTAAAAGCTGCTTTT  
K314A-R AAAAGCAGCTTTTACTGCAGTACTATGGGAATT  
V315A-F TCCCATAGTACTAAAGCAAAGCTGCTTTTGAT  
V315A-R ATCAAAGCAGCTTTTGCTTTAGTACTATGGGA  
K316A-F CATAGTACTAAAGTAGCAGCTGCTTTTGATGCT  
K316A-R AGCATCAAAGCAGCTGCTACTTTAGTACTATG  
A317G-F AGTACTAAAGTAAAAGGTGCTTTTGATGCTGCC  
A317G-R GGCAGCATCAAAGCACCTTTTACTTTAGTACT  
A318G-F ACTAAAGTAAAAGCTGGTTTTGATGCTGCCGTA  
A318G-R TACGGCAGCATCAAACCAGCTTTTACTTTAGT  
F319A-F AAAGTAAAAGCTGCTGCTGATGCTGCCGTAAGC  
F319A-R GCTTACGGCAGCATCAGCAGCAGCTTTTACTTT  
D320A-F GTAAAAGCTGCTTTTGCTGCTGCCGTAAGCGGA  
D320A-R TCCGCTTACGGCAGCAGCAAAGCAGCTTTTAC  
A321G-F AAAGCTGCTTTTGATGGTGCCGTAAGCGGAAAA  
A321G-R TTTTCCGCTTACGGCACCATCAAAGCAGCTTT  
A322G-F GCTGCTTTTGATGCTGGCGTAAGCGGAAAATCT  
A322G-R AGATTTTCCGCTTACGCCAGCATCAAAGCAGC  
V323A-F GCTTTTGATGCTGCCGCAAGCGGAAAATCTGTC  
V323A-R GACAGATTTTCCGCTTGCCGCAAGCATCAAAGC  
S324A-F TTTGATGCTGCCGTAGCCGAAAATCTGTCTCA  
S324A-R TGAGACAGATTTTCCGGCTACGGCAGCATCAA  
G325A-F GATGCTGCCGTAAGCGCAAATCTGTCTCAGGT  
G325A-R ACCTGAGACAGATTTTGCCTTACGGCAGCATC  
K326A-F GCTGCCGTAAGCGGAGCATCTGTCTCAGGTGAT  
K326A-R ATCACCTGAGACAGATGCTCCGCTTACGGCAGC  
S327A-F GCCGTAAGCGGAAAAGCTGTCTCAGGTGATGTA  
S327A-R TACATCACCTGAGACAGCTTTTCCGCTTACGGC  
V328A-F GTAAGCGGAAAATCTGCCTCAGGTGATGTAGAA  
V328A-R TTCTACATCACCTGAGGCAGATTTTCCGCTTAC  
S329A-F AGCGGAAAATCTGTCCGAGGTGATGTAGAACTA

S329A-R TAGTTCTACATCACCTGCGACAGATTTTCCGCT  
G330A-F GGAAATCTGTCTCAGCTGATGTAGAACTAACA  
G330A-R TGTTAGTTCTACATCAGCTGAGACAGATTTTCC  
D331A-F AAATCTGTCTCAGGTGCTGTAGAACTAACAAT  
D331A-R ATTTGTTAGTTCTACAGCACCTGAGACAGATTT  
V332A-F TCTGTCTCAGGTGATGCAGAACTAACAATATC  
V332A-R GATATTTGTTAGTTCTGCATCACCTGAGACAGA  
E333A-F GTCTCAGGTGATGTAGCACTAACAATATCATC  
E333A-R GATGATATTTGTTAGTGCTACATCACCTGAGAC  
L334A-F TCAGGTGATGTAGAAGCAACAATATCATCAA  
L334A-R TTTGATGATATTTGTTGCTTCTACATCACCTGA  
T335A-F GGTGATGTAGAACTAGCAAATATCATCAAAAAT  
T335A-R ATTTTTGATGATATTTGCTAGTTCTACATCACC  
N336A-F GATGTAGAACTAACAGCTATCATCAAAAATTCT  
N336A-R AGAATTTTTGATGATAGCTGTTAGTTCTACATC  
I337A-F GTAGAACTAACAATGCCATCAAAAATTCTTCC  
I337A-R GGAAGAATTTTTGATGGCATTGTTAGTTCTAC  
I338A-F GAACTAACAATATCGCCAAAATTCTTCCTTC  
I338A-R GAAGGAAGAATTTTTGGCGATATTTGTTAGTTC  
K339A-F CTAACAATATCATCGCAAATTCTTCCTTCAA  
K339A-R TTTGAAGGAAGAATTTGCGATGATATTTGTTAG  
N340A-F ACAAATATCATCAAAGCTTCTTCCTTCAAAGCC  
N340A-R GGCTTTGAAGGAAGAAGCTTTGATGATATTTGT  
S341A-F AATATCATCAAAAATGCTTCCTTCAAAGCCGTA  
S341A-R TACGGCTTTGAAGGAAGCATTGTTGATGATATT  
S342A-F ATCATCAAAAATTCTGCCTTCAAAGCCGTAATT  
S342A-R AATTACGGCTTTGAAGGCAGAATTTTTGATGAT  
F343A-F ATCAAAAATTCTTCGCAAAGCCGTAATTTAC  
F343A-R GTAAATTACGGCTTTGGCGGAAGAATTTTTGAT  
K344A-F AAAAATTCTTCCTTCGCAGCCGTAATTTACGGA  
K344A-R TCCGTAAATTACGGCTGCGAAGGAAGAATTTTT  
A345G-F AATTCTTCCTTCAAAGGCGTAATTTACGGAGGT  
A345G-R ACCTCCGTAAATTACGCCTTTGAAGGAAGAATT  
V346A-F TCTTCCTTCAAAGCCGCAATTTACGGAGGTTCC  
V346A-R GGAACCTCCGTAAATTGCGGCTTTGAAGGAAGA  
I347A-F TCCTTCAAAGCCGTAGCTTACGGAGGTTCCGCA  
I347A-R TGCGGAACCTCCGTAAGCTACGGCTTTGAAGGA  
Y348A-F TTCAAAGCCGTAATTGCCGGAGGTTCCGCAAAA  
Y348A-R TTTTGCGGAACCTCCGGCAATTACGGCTTTGAA  
G349A-F AAAGCCGTAATTTACGCAGGTTCCGCAAAAAGAT  
G349A-R ATCTTTTGCGGAACCTGCGTAAATTACGGCTTT  
G350A-F GCCGTAATTTACGGAGCTTCCGCAAAAAGATGAA  
G350A-R TTCATCTTTTGCGGAAGCTCCGTAAATTACGGC  
S351A-F GTAATTTACGGAGGTGCCGCAAAAAGATGAAGTT

S351A-R AACTTCATCTTTTGCGGCACCTCCGTAAATTAC  
A352G-F ATTTACGGAGGTTCCGGAAAAGATGAAGTTCAA  
A352G-R TTGAACTTCATCTTTTCCGGAACCTCCGTAAAT  
K353A-F TACGGAGGTTCCGCAGCAGATGAAGTTCAAATC  
K353A-R GATTTGAACTTCATCTGCTGCGGAACCTCCGTA  
D354A-F GGAGGTTCCGCAAAAGCTGAAGTTCAAATCATC  
D354A-R GATGATTTGAACTTCAGCTTTTGCGGAACCTCC  
E355A-F GGTTCCGCAAAAGATGCAGTTCAAATCATCGAC  
E355A-R GTCGATGATTTGAACTGCATCTTTTGCGGAACCC  
V356A-F TCCGCAAAAGATGAAGCTCAAATCATCGACGGC  
V356A-R GCCGTCGATGATTTGAGCTTCATCTTTTGCGGGA  
Q357A-F GCAAAAGATGAAGTTGCAATCATCGACGGCAAC  
Q357A-R GTTGCCGTCGATGATTGCAACTTCATCTTTTGC  
I358A-F AAAGATGAAGTTCAAGCCATCGACGGCAACCTC  
I358A-R GAGGTTGCCGTCGATGGCTTGAACTTCATCTTT  
I359A-F GATGAAGTTCAAATCGCCGACGGCAACCTCGGA  
I359A-R TCCGAGGTTGCCGTCGGCGATTTGAACTTCATC  
D360A-F GAAGTTCAAATCATCGCCGGCAACCTCGGAGAC  
D360A-R GTCTCCGAGGTTGCCGGCGATGATTTGAACTTC  
G361A-F GTTCAAATCATCGACGCCAACCTCGGAGACTTA  
G361A-R TAAGTCTCCGAGGTTGGCGTCGATGATTTGAAC  
N362A-F CAAATCATCGACGGCGCCCTCGGAGACTTACGC  
N362A-R GCGTAAGTCTCCGAGGGCGCCGTCGATGATTTG  
L363A-F ATCATCGACGGCAACGCCGGAGACTTACGCGAT  
L363A-R ATCGCGTAAGTCTCCGGCGTTGCCGTCGATGAT  
G364A-F ATCGACGGCAACCTCGCAGACTTACGCGATATT  
G364A-R AATATCGCGTAAGTCTGCGAGGTTGCCGTCGAT  
D365A-F GACGGCAACCTCGGAGCCTTACGCGATATTTTG  
D365A-R CAAAATATCGCGTAAGGCTCCGAGGTTGCCGTC  
L366A-F GGCAACCTCGGAGACGCACGCGATATTTTGAAA  
L366A-R TTTCAAATATCGCGTGCGTCTCCGAGGTTGCC  
R367A-F AACCTCGGAGACTTAGCCGATATTTTGAAAAAA  
R367A-R TTTTTCAAATATCGGCTAAGTCTCCGAGGTT  
D368A-F CTCGGAGACTTACGCGCTATTTTGAAAAAAGGC  
D368A-R GCCTTTTTTCAAATAGCGCGTAAGTCTCCGAG  
I369A-F GGAGACTTACGCGATGCTTTGAAAAAAGGCGCT  
I369A-R AGCGCCTTTTTTCAAAGCATCGCGTAAGTCTCC  
L370A-F GACTTACGCGATATTGCGAAAAAAGGCGCTACT  
L370A-R AGTAGCGCCTTTTTTCGCAATATCGCGTAAGTC  
K371A-F TTACGCGATATTTTGGCAAAAGGCGCTACTTTT  
K371A-R AAAAGTAGCGCCTTTTTGCCAAAATATCGCGTAA  
K372A-F CGCGATATTTTGAAGCAGGCGCTACTTTTAAT  
K372A-R ATTAAAAGTAGCGCCTGCTTTCAAATATCGCG  
G373A-F GATATTTTGAAAAAAGCCGCTACTTTTAATCGA

G373A-R TCGATTA AAAAGTAGCGGCTTTTTTCAAATATC  
A374G-F ATTTTGAAAAAAGGCGGTACTTTTAATCGAGAA  
A374G-R TTCTCGATTA AAAAGTACCGCCTTTTTTCAAAT  
T375A-F TTGAAAAAAGGCGCTGCTTTTAATCGAGAAACA  
T375A-R TGTTTCTCGATTA AAAAGCAGCGCCTTTTTTCAA  
F376A-F AAAAAAGGCGCTACTGCTAATCGAGAAACACCA  
F376A-R TGGTGTTTCTCGATTAGCAGTAGCGCCTTTTTT  
N377A-F AAAGGCGCTACTTTTGCTCGAGAAACACCAGGA  
N377A-R TCCTGGTGTTTCTCGAGCAAAGTAGCGCCTTT  
R378A-F GGCGCTACTTTTAATGCAGAAACACCAGGAGTT  
R378A-R AACTCCTGGTGTTTCTGCATTA AAAAGTAGCGCC  
E379A-F GCTACTTTTAATCGAGCAACACCAGGAGTTCCC  
E379A-R GGGAACTCCTGGTGTTGCTCGATTA AAAAGTAGC  
T380A-F ACTTTTAATCGAGAAGCACACCAGGAGTTCCCATT  
T380A-R AATGGGAACTCCTGGTGCTTCTCGATTA AAAAGT  
P381A-F TTTAATCGAGAAACAGCAGGAGTTCCCATTGCT  
P381A-R AGCAATGGGAACTCCTGCTGTTTCTCGATTA AA  
G382A-F AATCGAGAAACACCAGCAGTTCCCATTGCTTAT  
G382A-R ATAAGCAATGGGAACTGCTGGTGTTTCTCGATT  
V383A-F CGAGAAACACCAGGAGCTCCCATTGCTTATACA  
V383A-R TGTATAAGCAATGGGAGCTCCTGGTGTTTCTCG  
P384A-F GAAACACCAGGAGTTGCCATTGCTTATACAACA  
P384A-R TGTTGTATAAGCAATGGCAACTCCTGGTGTTTC  
I385A-F ACACCAGGAGTTCCCGCTGCTTATACAACAAAC  
I385A-R GTTTGTTGTATAAGCAGCGGGA ACTCCTGGTG  
A386G-F CCAGGAGTTCCCATTGGTTATACAACAAACTTC  
A386G-R GAAGTTTGTTGTATAACCAATGGGAACTCCTGG  
Y387A-F GGAGTTCCCATTGCTGCTACAACAAACTTCCTA  
Y387A-R TAGGAAGTTTGTTGTAGCAGCAATGGGAACTCC  
T388A-F GTTCCCATTGCTTATGCAACAAACTTCCTAAAA  
T388A-R TTTTAGGAAGTTTGTTGCATAAGCAATGGGAAC  
T389A-F CCCATTGCTTATACAGCAA ACTTCCTAAAAGAC  
T389A-R GTCTTTTAGGAAGTTTGCTGTATAAGCAATGGG  
N390A-F ATTGCTTATACAACAGCCTTCCTAAAAGACAAT  
N390A-R ATTGCTTTTTAGGAAGGCTGTTGTATAAGCAAT  
F391A-F GCTTATACAACAAACGCCCTAAAAGACAATGAA  
F391A-R TTCATTGTCTTTTAGGGCGTTTGTTGTATAAGC  
L392A-F TATACAACAAACTTCGCAAAGACAATGAATTA  
L392A-R TAATTCATTGTCTTTTGCGAAGTTTGTTGTATA  
K393A-F ACAACAAACTTCCTAGCAGACAATGAATTAGCT  
K393A-R AGCTAATTCATTGTCTGCTAGGAAGTTTGTTGT  
D394A-F ACAAACTTCCTAAAAGCCAATGAATTAGCTGTT  
D394A-R AACAGCTAATTCATTGGCTTTTAGGAAGTTTGT  
N395A-F AACTTCCTAAAAGACGCTGAATTAGCTGTTATT

N395A-R AATAACAGCTAATTCAGCGTCTTTTAGGAAGTT  
E396A-F TTCCTAAAAGACAATGCATTAGCTGTTATTAAA  
E396A-R TTTAATAACAGCTAATGCATTGTCTTTTAGGAA  
L397A-F CAAAAGACAATGAAGCAGCTGTTATTA AAAAC  
L397A-R GTTTTTAATAACAGCTGCTTCATTGTCTTTTAG  
A398G-F AAAGACAATGAATTAGGTGTTATTA AAAACAAC  
A398G-R GTTGTTTTTAATAACACCTAATTCATTGTCTTT  
V399A-F GACAATGAATTAGCTGCTATTA AAAACA ACTCA  
V399A-R TGAGTTGTTTTAATAGCAGCTAATTCATTGTC  
I400A-F AATGAATTAGCTGTTGCTAAAACA ACTCAGAA  
I400A-R TTCTGAGTTGTTTTAGCAACAGCTAATTCATT  
K401A-F GAATTAGCTGTTATTGCAAACA ACTCAGAATAT  
K401A-R ATATTCTGAGTTGTTTGCAATAACAGCTAATTC  
N402A-F TTAGCTGTTATTAAGCCA ACTCAGAATATATT  
N402A-R AATATATTCTGAGTTGGCTTTAATAACAGCTAA  
N403A-F GCTGTTATTA AAAACGCCTCAGAATATATTGAA  
N403A-R TTCAATATATTCTGAGGCGTTTTTAATAACAGC  
S404A-F GTTATTA AAAACAACGCAGAATATATTGAAACA  
S404A-R TGTTTCAATATATTCTGCGTTGTTTTTAATAAC  
E405A-F ATTA AAAACA ACTCAGCATATATTGAAACA ACT  
E405A-R AGTTGTTTCAATATATGCTGAGTTGTTTTTAAT  
Y406A-F AAAACA ACTCAGAAGCTATTGAAACA ACTTCA  
Y406A-R TGAAGTTGTTTCAATAGCTTCTGAGTTGTTTTT  
I407A-F AACA ACTCAGAATATGCTGAAACA ACTTCAAAA  
I407A-R TTTTGAAGTTGTTTCAGCATATTCTGAGTTGTT  
E408A-F AACTCAGAATATATTGCAACA ACTTCAAAAAGCT  
E408A-R AGCTTTTGAAGTTGTTGCAATATATTCTGAGTT  
T409A-F TCAGAATATATTGAAGCA ACTTCAAAAAGCTTAT  
T409A-R ATAAGCTTTTGAAGTTGCTTCAATATATTCTGA  
T410A-F GAATATATTGAAACAGCTTCAAAAAGCTTATACA  
T410A-R TGTATAAGCTTTTGAAGCTGTTTCAATATATTC  
S411A-F TATATTGAAACA ACTGCAAAAAGCTTATACAGAT  
S411A-R ATCTGTATAAGCTTTTGCAGTTGTTTCAATATA  
K412A-F ATTGAAACA ACTTCAGCAGCTTATACAGATGGA  
K412A-R TCCATCTGTATAAGCTGCTGAAGTTGTTTCAAT  
A413G-F GAAACA ACTTCAAAAAGGTTATACAGATGGAAAA  
A413G-R TTTTCCATCTGTATAACCTTTTGAAGTTGTTTC  
Y414A-F ACA ACTTCAAAAAGCTGCTACAGATGGAAAAATT  
Y414A-R AATTTTTCCATCTGTAGCAGCTTTTGAAGTTGT  
T415A-F ACTTCAAAAAGCTTATGCAGATGGAAAAATTAAC  
T415A-R GTTAATTTTTCCATCTGCATAAGCTTTTGAAGT  
D416A-F TCAAAAAGCTTATACAGCTGGAAAAATTAACATC  
D416A-R GATGTTAATTTTTCCAGCTGTATAAGCTTTTGA  
G417A-F AAAGCTTATACAGATGCAAAAATTAACATCGAT

G417A-R ATCGATGTTAATTTTTGCATCTGTATAAGCTTT  
K418A-F GCTTATACAGATGGAGCAATTAACATCGATCAC  
K418A-R GTGATCGATGTTAATTGCTCCATCTGTATAAGC  
I419A-F TATACAGATGGAAAAGCTAACATCGATCACTCT  
I419A-R AGAGTGATCGATGTTAGCTTTTCCATCTGTATA  
N420A-F ACAGATGGAAAAATTGCCATCGATCACTCTGGA  
N420A-R TCCAGAGTGATCGATGGCAATTTTTCCATCTGT  
I421A-F GATGGAAAAATTAACGCCGATCACTCTGGAGGA  
I421A-R TCCTCCAGAGTGATCGGCGTTAATTTTTCCATC  
D422A-F GGAAAAATTAACATCGCTCACTCTGGAGGATAC  
D422A-R GTATCCTCCAGAGTGAGCGATGTTAATTTTTCC  
H423A-F AAAATTAACATCGATGCCTCTGGAGGATACGTT  
H423A-R AACGTATCCTCCAGAGGCATCGATGTTAATTTT  
S424A-F ATTAACATCGATCACGCTGGAGGATACGTTGCT  
S424A-R AGCAACGTATCCTCCAGCGTGATCGATGTTAAT  
G425A-F AACATCGATCACTCTGCAGGATACGTTGCTCAA  
G425A-R TTGAGCAACGTATCCTGCAGAGTGATCGATGTT  
G426A-F ATCGATCACTCTGGAGCATAACGTTGCTCAATTC  
G426A-R GAATTGAGCAACGTATGCTCCAGAGTGATCGAT  
Y427A-F GATCACTCTGGAGGAGCCGTTGCTCAATTCAAC  
Y427A-R GTTGAATTGAGCAACGGCTCCTCCAGAGTGATC  
V428A-F CACTCTGGAGGATACGCTGCTCAATTCAACATT  
V428A-R AATGTTGAATTGAGCAGCGTATCCTCCAGAGTG  
A429G-F TCTGGAGGATACGTTGGTCAATTCAACATTTCT  
A429G-R AGAAATGTTGAATTGACCAACGTATCCTCCAGA  
Q430A-F GGAGGATACGTTGCTGCATTCAACATTTCTTGG  
Q430A-R CCAAGAAATGTTGAATGCAGCAACGTATCCTCC  
F431A-F GGATACGTTGCTCAAGCCAACATTTCTTGGGAT  
F431A-R ATCCCAAGAAATGTTGGCTTGAGCAACGTATCC  
N432A-F TACGTTGCTCAATTCGCCATTTCTTGGGATGAA  
N432A-R TTCATCCCAAGAAATGGCGAATTGAGCAACGTA  
I433A-F GTTGCTCAATTCAACGCTTCTTGGGATGAAGTA  
I433A-R TACTTCATCCCAAGAAGCGTTGAATTGAGCAAC  
S434A-F GCTCAATTCAACATTGCTTGGGATGAAGTAAAT  
S434A-R ATTTACTTCATCCCAAGCAATGTTGAATTGAGC  
W435A-F CAATTCAACATTTCTGCGGATGAAGTAAATTAT  
W435A-R ATAATTTACTTCATCCGCAGAAATGTTGAATTG  
D436A-F TTCAACATTTCTTGGGCTGAAGTAAATTATGAT  
D436A-R ATCATAATTTACTTCAGCCCAAGAAATGTTGAA  
E437A-F AACATTTCTTGGGATGCAGTAAATTATGATCCT  
E437A-R AGGATCATAATTTACTGCATCCCAAGAAATGTT  
V438A-F ATTTCTTGGGATGAAGCAAATTATGATCCTGAA  
V438A-R TTCAGGATCATAATTTGCTTCATCCCAAGAAAT  
N439A-F TCTTGGGATGAAGTAGCTTATGATCCTGAAGGT

N439A-R ACCTTCAGGATCATAAGCTACTTCATCCCAAGA  
Y440A-F TGGGATGAAGTAAATGCTGATCCTGAAGGTAAC  
Y440A-R GTTACCTTCAGGATCAGCATTACTTCATCCCA  
D441A-F GATGAAGTAAATTATGCTCCTGAAGGTAACGAA  
D441A-R TTCGTTACCTTCAGGAGCATAATTTACTTCATC  
P442A-F GAAGTAAATTATGATGCTGAAGGTAACGAAATT  
P442A-R AATTTTCGTTACCTTCAGCATCATAATTTACTTC  
E443A-F GTAAATTATGATCCTGCAGGTAACGAAATTGTT  
E443A-R AACAATTTTCGTTACCTGCAGGATCATAATTTAC  
G444A-F AATTATGATCCTGAAGCTAACGAAATTGTTCAA  
G444A-R TTGAACAATTTTCGTTAGCTTCAGGATCATAATT  
N445A-F TATGATCCTGAAGGTGCCGAAATTGTTCAACAT  
N445A-R ATGTTGAACAATTTTCGGCACCTTCAGGATCATA  
E446A-F GATCCTGAAGGTAACGCAATTGTTCAACATAAA  
E446A-R TTTATGTTGAACAATTGCGTTACCTTCAGGATC  
I447A-F CCTGAAGGTAACGAAGCTGTTCAACATAAAAAC  
I447A-R GTTTTTATGTTGAACAGCTTCGTTACCTTCAGG  
V448A-F GAAGGTAACGAAATTGCTCAACATAAAAACCTGG  
V448A-R CCAGTTTTTATGTTGAGCAATTTTCGTTACCTTC  
Q449A-F GGTAACGAAATTGTTGCACATAAAAACCTGGAGC  
Q449A-R GCTCCAGTTTTTATGTGCAACAATTTTCGTTACC  
H450A-F AACGAAATTGTTCAAGCTAAAACCTGGAGCGAA  
H450A-R TTCGCTCCAGTTTTTAGCTTGAACAATTTTCGTT  
K451A-F GAAATTGTTCAACATGCAAACCTGGAGCGAAAAC  
K451A-R GTTTTCGCTCCAGTTTGCATGTTGAACAATTTTC  
N452A-F ATGTTCAACATAAAGCCTGGAGCGAAAACAAT  
N452A-R ATTGTTTTCGCTCCAGGCTTTTATGTTGAACAAT  
W453A-F GTTCAACATAAAAACGCGAGCGAAAACAATAAA  
W453A-R TTTATTGTTTTTCGCTCGCGTTTTTATGTTGAAC  
S454A-F CAACATAAAAACCTGGGCGGAAAACAATAAAAGC  
S454A-R GCTTTTTATTGTTTTCCGCCAGTTTTTATGTTG  
E455A-F CATAAAAACCTGGAGCGCAAACAATAAAAGCAAG  
E455A-R CTTGCTTTTATTGTTTTCGCTCCAGTTTTTATG  
N456A-F AAAAACCTGGAGCGAAGCCAATAAAAGCAAGCTA  
N456A-R TAGCTTGCTTTTTATTGGCTTCGCTCCAGTTTTT  
N457A-F AACTGGAGCGAAAACGCTAAAAGCAAGCTAGCT  
N457A-R AGCTAGCTTGCTTTTTAGCGTTTTTCGCTCCAGTT  
K458A-F TGGAGCGAAAACAATGCAAGCAAGCTAGCTCAT  
K458A-R ATGAGCTAGCTTGCTTGCATTGTTTTTCGCTCCA  
S459A-F AGCGAAAACAATAAAGCCAAGCTAGCTCATTTC  
S459A-R GAAATGAGCTAGCTTGGCTTTATTGTTTTTCGCT  
K460A-F GAAAACAATAAAAGCGCGCTAGCTCATTTCACA  
K460A-R TGTGAAATGAGCTAGCGCGCTTTTTATTGTTTTC  
L461A-F AACAATAAAAGCAAGGCAGCTCATTTTCACATCG



L461A-R CGATGTGAAATGAGCTGCCTTGCTTTTATTGTT  
A462G-F AATAAAAGCAAGCTAGGTCATTTACATCGTCC  
A462G-R GGACGATGTGAAATGACCTAGCTTGCTTTTATT  
H463A-F AAAAGCAAGCTAGCTGCTTTCACATCGTCCATC  
H463A-R GATGGACGATGTGAAAGCAGCTAGCTTGCTTTT  
F464A-F AGCAAGCTAGCTCATGCCACATCGTCCATCTAT  
F464A-R ATAGATGGACGATGTGGCATGAGCTAGCTTGCT  
T465A-F AAGCTAGCTCATTTTCGCATCGTCCATCTATTTG  
T465A-R CAAATAGATGGACGATGCGAAATGAGCTAGCTT  
S466A-F CTAGCTCATTTTCACAGCGTCCATCTATTTGCCA  
S466A-R TGGCAAATAGATGGACGCTGTGAAATGAGCTAG  
S467A-F GCTCATTTTCACATCGGCCATCTATTTGCCAGGT  
S467A-R ACCTGGCAAATAGATGGCCGATGTGAAATGAGC  
I468A-F CATTTTCACATCGTCCGCCTATTTGCCAGGTAAC  
I468A-R GTTACCTGGCAAATAGGCGGACGATGTGAAATG  
Y469A-F TTCACATCGTCCATCGCTTTGCCAGGTAACGCG  
Y469A-R CGCGTTACCTGGCAAAGCGATGGACGATGTGAA  
L470A-F ACATCGTCCATCTATGCGCCAGGTAACGCGAGA  
L470A-R TCTCGCGTTACCTGGCGCATAGATGGACGATGT  
P471A-F TCGTCCATCTATTTGGCAGGTAACGCGAGAAAT  
P471A-R ATTTCTCGCGTTACCTGCCAAATAGATGGACGA  
G472A-F TCCATCTATTTGCCAGCTAACGCGAGAAATATT  
G472A-R AATATTTCTCGCGTTAGCTGGCAAATAGATGGA  
N473A-F ATCTATTTGCCAGGTGCCGCGAGAAATATTAAT  
N473A-R ATTAATATTTCTCGCGGCACCTGGCAAATAGAT  
A474G-F TATTTGCCAGGTAACGGGAGAAATATTAATGTT  
A474G-R AACATTAATATTTCTCCCGTTACCTGGCAAATA  
R475A-F TTGCCAGGTAACGCGGCAAATATTAATGTTTAC  
R475A-R GTAAACATTAATATTTGCCGCGTTACCTGGCAA  
N476A-F CCAGGTAACGCGAGAGCTATTAATGTTTACGCT  
N476A-R AGCGTAAACATTAATAGCTCTCGCGTTACCTGG  
I477A-F GGTAACGCGAGAAATGCTAATGTTTACGCTAAA  
I477A-R TTTAGCGTAAACATTAGCATTTCTCGCGTTACC  
N478A-F AACGCGAGAAATATTGCTGTTTACGCTAAAGAA  
N478A-R TTCTTTAGCGTAAACAGCAATATTTCTCGCGTT  
V479A-F GCGAGAAATATTAATGCTTACGCTAAAGAATGC  
V479A-R GCATTCTTTAGCGTAAGCATTAAATATTTCTCGC  
Y480A-F AGAAATATTAATGTTGCCGCTAAAGAATGCACT  
Y480A-R AGTGCATTCTTTAGCGGCAACATTAATATTTCT  
A481G-F AATATTAATGTTTACGGTAAAGAATGCACTGGT  
A481G-R ACCAGTGCATTCTTTACCGTAAACATTAATATT  
K482A-F ATTAATGTTTACGCTGCAGAATGCACTGGTTTA  
K482A-R TAAACCAGTGCATTCTGCAGCGTAAACATTAAT  
E483A-F AATGTTTACGCTAAAGCATGCACTGGTTTAGCT

E483A-R AGCTAAACCAGTGCATGCTTTAGCGTAAACATT  
C484A-F GTTTACGCTAAAGAAGCCACTGGTTTAGCTTGG  
C484A-R CCAAGCTAAACCAGTGGCTTCTTTAGCGTAAAC  
T485A-F CGCTAAAGAATGCGCTGGTTTAGCTTGGG  
T485A-R CCCAAGCTAAACCAGCGCATTCTTTAGCG  
G486A-F GCTAAAGAATGCACTGCTTTAGCTTGGGAATGG  
G486A-R CCATTCCCAAGCTAAAGCAGTGCATTCTTTAGC  
L487A-F GAATGCACTGGTGCAGCTTGGGAATGGTGG  
L487A-R CCACCATTCCCAAGCTGCACCAGTGCATTC  
A488G-F GAATGCACTGGTTTAGGTTGGGAATGGTGG  
A488G-R CCACCATTCCCAACCTAAACCAGTGCATTC  
W489A-F GCACTGGTTTAGCTGCGGAATGGTGGAGAACG  
W489A-R CGTTCTCCACCATTCCGCAGCTAAACCAGTGC  
E490A-F GGTTTAGCTTGGGCATGGTGGAGAACGG  
E490A-R CCGTTCTCCACCATGCCCAAGCTAAACC  
W491A-F GTTTAGCTTGGGAAGCGTGGAGAACGGTAAATG  
W491A-R CATTTACCGTTCTCCACGCTTCCCAAGCTAAAC  
W492A-F GCTTGGGAATGGGCGAGAACGGTAATTGATG  
W492A-R CATCAATTACCGTTCTCGCCCATTCCCAAGC  
R493A-F GGAATGGTGGGCAACGGTAATTGATGACCG  
R493A-R CGGTCATCAATTACCGTTGCCACCATTCCC  
T494A-F TGGGAATGGTGGAGAGCGGTAATTGATGACCGGAAC  
T494A-R GTTCCGGTCATCAATTACCGCTCTCCACCATTCCCA  
V495A-F GAATGGTGGAGAACGGCAATTGATGACCGGAACTTA  
V495A-R TAAGTTCCGGTCATCAATTGCCGTTCTCCACCATT  
I496A-F TGGTGGAGAACGGTAGCTGATGACCGGAACTTACCA  
I496A-R TGGTAAGTTCCGGTCATCAGCTACCGTTCTCCACCA  
D497A-F TGGAGAACGGTAATTGCTGACCGGAACTTACCACTT  
D497A-R AAGTGGTAAGTTCCGGTCAGCAATTACCGTTCTCCA  
D498A-F AGAACGGTAATTGATGCCCGGAACTTACCACTTGTG  
D498A-R CACAAGTGGTAAGTTCCGGGCATCAATTACCGTTCT  
R499A-F ACGGTAATTGATGACGCGAACTTACCACTTGTGAAA  
R499A-R TTTACAAGTGGTAAGTTCCGCGTCATCAATTACCGT  
N500A-F GTAATTGATGACCGGGCCTTACCACTTGTGAAAAT  
N500A-R ATTTTTTACAAGTGGTAAGGCCCGGTCATCAATTAC  
L501A-F ATTGATGACCGGAACGCACCACTTGTGAAAATAGA  
L501A-R TCTATTTTTTACAAGTGGTGCGTTCCGGTCATCAAT  
P502A-F GATGACCGGAACTTAGCACTTGTGAAAATAGAAAT  
P502A-R ATTTCTATTTTTTACAAGTGCTAAGTTCCGGTCATC  
L503A-F GACCGGAACTTACCAGCTGTGAAAATAGAAATATC  
L503A-R GATATTTCTATTTTTTACAGCTGGTAAGTTCCGGTC  
V504A-F CGGAACTTACCACTTGCGAAAATAGAAATATCTCC  
V504A-R GGAGATATTTCTATTTTTTCCGCAAGTGGTAAGTTCCG  
K505A-F AACTTACCACTTGTGGCAAATAGAAATATCTCCATC

K505A-R GATGGAGATATTTCTATTTGCCACAAGTGGTAAGTT  
N506A-F TTACCACTTGTGAAAGCTAGAAATATCTCCATCTGG  
N506A-R CCAGATGGAGATATTTCTAGCTTTTACAAGTGGTAA  
R507A-F CCACTTGTGAAAAATGCAAATATCTCCATCTGGGGC  
R507A-R GCCCCAGATGGAGATATTTGCATTTTTTACAAGTGG  
N508A-F CTTGTGAAAAATAGAGCTATCTCCATCTGGGGCACC  
N508A-R GGTGCCCCAGATGGAGATAGCTCTATTTTTTACAAG  
I509A-F GTGAAAAATAGAAATGCCTCCATCTGGGGCACCACG  
I509A-R CGTGGTGCCCCAGATGGAGGCATTTCTATTTTTTAC  
S510A-F AAAAATAGAAATATCGCCATCTGGGGCACCACGCTT  
S510A-R AAGCGTGGTGCCCCAGATGGCGATATTTCTATTTTT  
I511A-F AATAGAAATATCTCCGCCTGGGGCACCACGCTTTAT  
I511A-R ATAAAGCGTGGTGCCCCAGGCGGAGATATTTCTATT  
W512A-F AGAAATATCTCCATCGCGGGCACCACGCTTTATCCG  
W512A-R CGGATAAAGCGTGGTGCCCGCGATGGAGATATTTCT  
G513A-F AATATCTCCATCTGGGCCACCACGCTTTATCCGAAA  
G513A-R TTTCGGATAAAGCGTGGTGCCCCAGATGGAGATATT  
T514A-F ATCTCCATCTGGGGCGCCACGCTTTATCCGAAATAT  
T514A-R ATATTTTCGGATAAAGCGTGGCGCCCCAGATGGAGAT  
T515A-F TCCATCTGGGGCACCACGCTTTATCCGAAATATAGT  
T515A-R ACTATATTTTCGGATAAAGCGCGGTGCCCCAGATGGA  
L516A-F ATCTGGGGCACCACGCTTATCCGAAATATAGTAAT  
L516A-R ATTACTATATTTTCGGATAAAGCGTGGTGCCCCAGAT  
Y517A-F TGGGGCACCACGCTTGCTCCGAAATATAGTAATAAA  
Y517A-R TTTATTACTATATTTTCGGAGCAAGCGTGGTGCCCCA  
P518A-F GGCACCACGCTTTATGCGAAATATAGTAATAAAGTA  
P518A-R TACTTTATTACTATATTTTCGCATAAAGCGTGGTGCC  
K519A-F ACCACGCTTTATCCGGCATATAGTAATAAAGTAGAT  
K519A-R ATCTACTTTATTACTATATGCCGGATAAAGCGTGGT  
Y520A-F ACGCTTTATCCGAAAGCTAGTAATAAAGTAGATAAT  
Y520A-R ATTATCTACTTTATTACTAGCTTTTCGGATAAAGCGT  
S521A-F CTTTATCCGAAATATGCTAATAAAGTAGATAATCCA  
S521A-R TGGATTATCTACTTTATTAGCATATTTTCGGATAAAG  
N522A-F TATCCGAAATATAGTGCTAAAGTAGATAATCCAATC  
N522A-R GATTGGATTATCTACTTTAGCACTATATTTTCGGATA  
K523A-F CCGAAATATAGTAATGCAGTAGATAATCCAATCGAA  
K523A-R TTCGATTGGATTATCTACTGCATTACTATATTTTCGG  
V524A-F AAATATAGTAATAAAGCAGATAATCCAATCGAATAA  
V524A-R TTATTCGATTGGATTATCTGCTTTATTACTATATTT  
D525A-F TATAGTAATAAAGTAGCTAATCCAATCGAATAATTG  
D525A-R CAATTATTCGATTGGATTAGCTACTTTATTACTATA  
N526A-F AGTAATAAAGTAGATGCTCCAATCGAATAATTGTAA  
N526A-R TTACAATTATTCGATTGGAGCATCTACTTTATTACT  
P527A-F AATAAAGTAGATAATGCAATCGAATAATTGTAAAAG

|         |                                      |
|---------|--------------------------------------|
| P527A-R | CTTTTACAATTATTCGATTGCATTATCTACTTTATT |
| I528A-F | AAAGTAGATAATCCAGCCGAATAATTGTAAAAGTAA |
| I528A-R | TTACTTTTACAATTATTCGGCTGGATTATCTACTTT |
| E529A-F | GTAGATAATCCAATCGCATAATTGTAAAAGTAATAA |
| E529A-R | TTATTACTTTTACAATTATGCGATTGGATTATCTAC |

---

Supplemental Table 4.  
Signature-tag-specific amplification primers  
(each used in combination with primer pPL2-359R)

---

|        |                           |
|--------|---------------------------|
| Tag5   | CCAACCCCGCAAACCTCTC       |
| Tag6   | CCATAGCTACCACACGATAGC     |
| Tag11  | GGTTTAGAGGTTTATTTTCGTGTG  |
| Tag20  | ATCCAACGCCCATGCTATT       |
| Tag58  | GACGTCCGCAAATCACTAG       |
| Tag102 | CGATATCTACCCCAATCTCTC     |
| Tag116 | GGAGATGGAGCTCTTGGGT       |
| Tag119 | ATAAAGAGAGCTAAACAAAAACATC |
| Tag122 | GACGTCACAGCTCCAAACC       |
| Tag128 | TAGGTGTATGTGGCGAGGG       |
| Tag146 | CCATATCGCCACCCCACTA       |
| Tag150 | ATATACCGCTCAACATACACC     |
| Tag159 | CAGACACACAACCAGGCTATT     |
| Tag168 | GACGTCATATAACAATCCCTAG    |
| Tag169 | GGTTCGGGATAGTGATATAGA     |
| Tag177 | AGATGGGGAGTTGGTGGTC       |
| Tag184 | GTCCTCTATCTAGCTCGAGC      |
| Tag191 | GACGTCAACTACCGCAAACG      |
| Tag201 | TATCTCGAGAAAGCTCCGCT      |
| Tag204 | GACGTCTTAGCGATCTCTCG      |
| Tag205 | GCTACCCTGATATCCCCCT       |
| Tag208 | CTAGAGGTATAGGGGTTTGGGTCG  |
| Tag209 | GTGCTATTGCTAGAGTGATAG     |
| Tag210 | TTGTGGCGGGCTCTAGATC       |
| Tag211 | GGTCGCTTTATAGCGATTTATA    |
| Tag212 | GATCGCGTTATAGATGTATTGC    |
| Tag213 | ACATAGACACATCAAATCCCCAG   |
| Tag219 | CTACAGCAATCACGATATACC     |
| Tag230 | CGTCCCAGACCCAGACCTA       |
| Tag231 | GACGTCCTAAAGCACTCTTAG     |

Tag234 CAGCCAGCACTCCGATATAT  
Tag242 ATTTTCGATGTATATATGTAGCGA  
Tag249 CGTCATATATATGTTCGATCGC  
Tag282 ACAGAACGCGATAACTCTCTA  
Tag288 CTAGACCTCTAGCTACATCG  
Tag290 ACCGACAGCTCGAACAAGC  
Tag295 CCCCAGAGAAAGATAAACCTCC  
Tag296 GACGTCGTGGATAGTGAGG  
Tag297 CGAGTCAGAGGTCTAGCTAT  
Tag298 CAGTCTCGAGTGCGGCTAT  
pPL2-359R CTTAATGAATTACAACAGTACTGC

---

Supplemental Table 5.  
Primers used for signature tag sequence insertion to pPL2

---

|          |                                                                                      |
|----------|--------------------------------------------------------------------------------------|
| Tag5-F   | GTGAGTCGTATTGACGTCATCTACACCCAAACCCCGCAAACCTCTCCC<br>GCCCTCTAGCA GCTATTTAACGACCCTGCCC |
| Tag5-R   | GGGCAGGGTCGTAAATAGCTGCTAGAGGGGCGGGAGAGTTTGCGGG<br>GTTTGGGTGTAGATGACGTCAATACGACTCAC   |
| Tag6-F   | GTGAGTCGTATTGACGTCCCATAGCTACCACACGATAGCTCCCCCTA<br>GCCCCCTACACGCTATTTAACGACCCTGCCC   |
| Tag6-R   | GGGCAGGGTCGTAAATAGCGTGTAGGGGGCTAGGGGGAGCTATCG<br>TGTGGTAGCTATGGGACGTCAATACGACTCAC    |
| Tag11-F  | GTGAGTCGTATTGACGTCCGGGGTGGTGTGTGGGAGGTTTAGAGGTT<br>TATTCGTGTGGCTATTTAACGACCCTGCCC    |
| Tag11-R  | GGGCAGGGTCGTAAATAGCCACACGAAATAAACCTCTAACCTCCC<br>ACACACCACCCCGGACGTCAATACGACTCAC     |
| Tag20-F  | GTGAGTCGTATTGACGTCATCAACAACCTACCGACCACGATCGACATCC<br>AACGCCCATGCTATTTAACGACCCTGCCC   |
| Tag20-R  | GGGCAGGGTCGTAAATAGCATGGGGCGTTGGATGTCGATCGTGGTC<br>GGTAGTTGTTGATGACGTCAATACGACTCAC    |
| Tag58-F  | GTGAGTCGTATTGACGTCCGCAAATCACTAGCCCTATAGCGACCCC<br>TCTACCCCAACGCTATTTAACGACCCTGCCC    |
| Tag58-R  | GGGCAGGGTCGTAAATAGCGTTGGGGTAGAGGGGTCGCTATAGGG<br>CTAGTGATTTTGCGGACGTCAATACGACTCAC    |
| Tag102-F | GTGAGTCGTATTGACGTCAACCATAGCGATATCTACCCCAATCTCTCG<br>CCCCCTCTACGCTATTTAACGACCCTGCCC   |
| Tag102-R | GGGCAGGGTCGTAAATAGCGTAGAGGGGGCGAGAGATTGGGGTAG<br>ATATCGCTATGGTTGACGTCAATACGACTCAC    |
| Tag116-F | GTGAGTCGTATTGACGTCCGATGGCGGAGATGGAGCTCTTGGGTGCT<br>CTTGCGGTTGGCTATTTAACGACCCTGCCC    |

Tag116-R GGGCAGGGTCGTTAAATAGCCAACCGCAAGAGCACCCAAGAGCTCCA  
TCTCCGCCATCCGACGTCAATACGACTCAC

Tag119-F GTGAGTCGTATTGACGTCCGCCCCCTCCCCACATAAAGAGAGCTAAA  
CAAAAACATCAGCTATTTAACGACCCTGCCC

Tag119-R GGGCAGGGTCGTTAAATAGCTGATGTTTTTGTAGCTCTCTTTATGT  
GGGGAGGGGGCGGACGTCAATACGACTCAC

Tag122-F GTGAGTCGTATTGACGTCACAGCTCCAAACCTCGCTAACAGCCCAC  
CCACTCTCCACGCTATTTAACGACCCTGCCC

Tag122-R GGGCAGGGTCGTTAAATAGCGTGGAGAGTGGGTGGGCTGTTTAGCG  
AGGTTTGGAGCTGTGACGTCAATACGACTCAC

Tag128-F GTGAGTCGTATTGACGTCTTAGGTAGGTGTATGTGGCGAGGGCGCTG  
GAGAGAGATAGGCTATTTAACGACCCTGCCC

Tag128-R GGGCAGGGTCGTTAAATAGCCTATCTCTCTCCAGCGCCCTCGCCACA  
TACACCTACCTAAGACGTCAATACGACTCAC

Tag146-F GTGAGTCGTATTGACGTCCGCCATATCGCCACCCCACTAGCCCCCCC  
TCACCACCTCTGCTATTTAACGACCCTGCCC

Tag146-R GGGCAGGGTCGTTAAATAGCAGAGGTGGTGAGGGGGGGCTAGTGGG  
GTGGCGATATGGCGGACGTCAATACGACTCAC

Tag150-F GTGAGTCGTATTGACGTCATATACCGCTCAACATACACCCCCATCCCC  
CCACCTCGCAGCTATTTAACGACCCTGCCC

Tag150-R GGGCAGGGTCGTTAAATAGCTGCGAGGTGGGGGGATGGGGGTGTAT  
GTTGAGCGGTATATGACGTCAATACGACTCAC

Tag159-F GTGAGTCGTATTGACGTCAAACACCGAACACCCCCACGCACCAGA  
CACACAACCAGGCTATTTAACGACCCTGCCC

Tag159-R GGGCAGGGTCGTTAAATAGCCTGGTTGTGTGTCTGGTGCGTGGGGG  
GGTGTTCGGTGTGTTGACGTCAATACGACTCAC

Tag168-F GTGAGTCGTATTGACGTCATATAACAATCCCTAGCCCCCTATCCAGCC  
ATCTCTCCCCGCTATTTAACGACCCTGCCC



Tag168-R GGGCAGGGTCGTTAAATAGCGGGGAGAGATGGCTGGATAGGGGGCT  
AGGGATTGTTATATGACGTCAATACGACTCAC

Tag169-F GTGAGTCGTATTGACGTCGGTTCGGGATAGTGATATAGATGTGGGGG  
GGGTGGGCTCGGCTATTTAACGACCCTGCCC

Tag169-R GGGCAGGGTCGTTAAATAGCCGAGCCCACCCCCCCCACATCTATATC  
ACTATCCCGAACCGACGTCAATACGACTCAC

Tag177-F GTGAGTCGTATTGACGTCAGATGGAGATGGGGAGTTGGTGGTCTGGG  
GTGGCGGGTATGCTATTTAACGACCCTGCCC

Tag177-R GGGCAGGGTCGTTAAATAGCATACCCGCCACCCCGACCACCAACTCC  
CCATCTCCATCTGACGTCAATACGACTCAC

Tag184-F GTGAGTCGTATTGACGTCCTCTATCTAGCTCGAGCCATATATCGCCAC  
CTACCCCCCGCTATTTAACGACCCTGCCC

Tag184-R GGGCAGGGTCGTTAAATAGCGGGGGGGTAGGTGGCGATATATGGCT  
CGAGCTAGATAGAGGACGTCAATACGACTCAC

Tag191-F GTGAGTCGTATTGACGTCAACTACCGCAAACGCTCGCTAAAAACATCC  
ATATCTAACGCTATTTAACGACCCTGCCC

Tag191-R GGGCAGGGTCGTTAAATAGCGTTAGATATGGATGTTTTTTAGCGAGCG  
TTTGCGGTAGTTGACGTCAATACGACTCAC

Tag201-F GTGAGTCGTATTGACGTCCTCCCTCCCTCCACCTCACCTCTATCTCG  
AGAAAGCTCCGCTATTTAACGACCCTGCCC

Tag201-R GGGCAGGGTCGTTAAATAGCGGAGCTTTCTCGAGATAGAGGGTGAG  
GTGGAGGGAGGGAGGACGTCAATACGACTCAC

Tag204-F GTGAGTCGTATTGACGTCCTTAGCGATCTCTCGCGCTTGGGGGATAGC  
TATATGGGTATGCTATTTAACGACCCTGCCC

Tag204-R GGGCAGGGTCGTTAAATAGCATACCCATATAGCTATCCCCCAAGCGC  
GAGAGATCGCTAAGACGTCAATACGACTCAC

Tag205-F GTGAGTCGTATTGACGTCCCCCGCTACCCCGATATCCCCCTCTCCG  
CTCTCTAGCAGCTATTTAACGACCCTGCCC

Tag205-R GGGCAGGGTCGTTAAATAGCTGCTAGAGAGCGGAGAGGGGGATATC  
GGGGTAGCGGGGGGACGTCAATACGACTCAC

Tag208-F GTGAGTCGTATTGACGTCGTCGAGCTATAGGGATCTAGTGGTATAGG  
GGTTTGGGTCGGCTATTTAACGACCCTGCCC

Tag208-R GGGCAGGGTCGTTAAATAGCCGACCCAAACCCCTATACCACTAGATC  
CCTATAGCTCGACGACGTCAATACGACTCAC

Tag209-F GTGAGTCGTATTGACGTCTTATGGGTAGAGCGAGATTGTGCTATTGCT  
AGAGTGATAGGCTATTTAACGACCCTGCCC

Tag209-R GGGCAGGGTCGTTAAATAGCCTATCACTCTAGCAATAGCACAATCTCG  
CTCTACCCATAAGACGTCAATACGACTCAC

Tag210-F GTGAGTCGTATTGACGTCGGAGCGGGATGGAGCGTTGTGGCGGGCT  
CTAGATCGGGTGGCTATTTAACGACCCTGCCC

Tag210-R GGGCAGGGTCGTTAAATAGCCACCCGATCTAGAGCCCGCCACAACG  
CTCCATCCCGCTCCGACGTCAATACGACTCAC

Tag211-F GTGAGTCGTATTGACGTCGGAGAGCGGTTCGCTTTATAGCGATTTATAT  
ATATCTAGTTGCTATTTAACGACCCTGCCC

Tag211-R GGGCAGGGTCGTTAAATAGCAACTAGATATATATAAATCGCTATAAAG  
CGACCGCTCTCCGACGTCAATACGACTCAC

Tag212-F GTGAGTCGTATTGACGTCGTAGAGATATAGAGCGATCGCGTTATAGAT  
GTATTGCTGGGCTATTTAACGACCCTGCCC

Tag212-R GGGCAGGGTCGTTAAATAGCCCAGCAATACATCTATAACGCGATCGC  
TCTATATCTCTACGACGTCAATACGACTCAC

Tag213-F GTGAGTCGTATTGACGTCACATAGACACATCAAATCCCCAGCTCTCT  
AGCGCCATAAGCTATTTAACGACCCTGCCC

Tag213-R GGGCAGGGTCGTTAAATAGCTTATGGCGCTAGAGAGCTGGGGATTTT  
GATGTGTCTATGTGACGTCAATACGACTCAC

Tag219-F GTGAGTCGTATTGACGTCCCCTAAAACCCTACAGCAATCACGATATAC  
CGCTCCCGACGCTATTTAACGACCCTGCCC

Tag219-R GGCAGGGTCGTTAAATAGCCAGTGTCGCGATAGCTAGACCTCTGAC  
TCGATTTGGCGACGGATCGACGTCAATACGACTCAC
